# Supplementary material for: Systematic review and network meta-analysis comparing palbociclib with chemotherapy agents for the treatment of postmenopausal women with HR-positive and HER2-negative advanced/metastatic breast cancer
Source: PubMed Central journal article supplement (PMC5645434; doi:10.1007/s10549-017-4404-4), 2017-07-27
Supplement: 10549_2017_4404_MOESM1_ESM.pdf [file 10549_2017_4404_MOESM1_ESM.pdf]

## **SUPPLEMENTARY APPENDICES**

### **Systematic Review and Network Meta-analysis Comparing Palbociclib with Chemotherapy Agents for the Treatment of Postmenopausal Women with HR-Positive and HER2-Negative Advanced/Metastatic Breast Cancer**

**Authors:**

Wilson, F.R., Varu, A., Mitra, D., Cameron, C., Iyer, S.

**Corresponding Author:**

Chris Cameron

Cornerstone Research Group Inc.

Suite 204, 3228 South Service Road,

Burlington, Ontario,

L7N 3H8

Canada

Phone: 613-852-2374

Email: [ccameron@cornerstone-research.com](mailto:ccameron@cornerstone-research.com)

## Appendix A: Search Strategy

| OVERVIEW                                                                                                                                                                                                                                                                                                                                                                                                                                                                                                                                                                                                           |
|--------------------------------------------------------------------------------------------------------------------------------------------------------------------------------------------------------------------------------------------------------------------------------------------------------------------------------------------------------------------------------------------------------------------------------------------------------------------------------------------------------------------------------------------------------------------------------------------------------------------|
| <p>Databases:<br/>Ovid MEDLINE<br/>Pubmed<br/>OVID EMBASE<br/>OVID EBM Reviews (Cochrane Library) including:</p> <ul style="list-style-type: none"> <li>Cochrane Central Register of Controlled Trials (CENTRAL)</li> </ul> <p>Search syntax has been customized for each database.</p> <p>Date of Search: March 2- 4, 2016<br/>Study Types: Randomized Controlled Trials (RCTs)<br/>Limits: Studies published after 2014</p> <p>Note:<br/>†† “*”, “# “, and “?” are truncation characters that retrieve all possible suffix variations of the root word e.g. surg* retrieves surgery, surgical, surgeon, etc.</p> |

| Database                                                                                  | Date Searched                                                                | Search Strategy                                                                                                                                                                                             |         |
|-------------------------------------------------------------------------------------------|------------------------------------------------------------------------------|-------------------------------------------------------------------------------------------------------------------------------------------------------------------------------------------------------------|---------|
| Ovid Medline In-Process & Other Non-Indexed Citations and Ovid MEDLINE(R) 1946 to Present | March 4, 2016<br><br><b>Results 570</b><br><br>record # 1- 517 & 2542 - 2558 | 1 exp Breast Neoplasms/                                                                                                                                                                                     | 236278  |
|                                                                                           |                                                                              | 2 carcinoma, lobular/                                                                                                                                                                                       | 4465    |
|                                                                                           |                                                                              | 3 exp carcinoma, intraductal, noninfiltrating/                                                                                                                                                              | 8643    |
|                                                                                           |                                                                              | 4 "neoplasms, ductal, lobular, and medullary"/                                                                                                                                                              | 69      |
|                                                                                           |                                                                              | 5 exp paget's disease, mammary/                                                                                                                                                                             | 681     |
|                                                                                           |                                                                              | 6 (paget* and (breast* or mammar* or mammary or nipple*)).tw.                                                                                                                                               | 1063    |
|                                                                                           |                                                                              | 7 ((breast* or mammar*) adj5 (cancer* or neoplasm* or tumor?r* or oncolog* or malignan* or carcinoma* or sarcoma* or adenocarcinoma* or leiomyosarcoma* or dcis or infiltrat* or medullary or tubular)).mp. | 325908  |
|                                                                                           |                                                                              | 8 ((lobul* or duct* or intraduct*) adj5 (cancer* or neoplasm* or tumor?r* or oncolog* or malignan* or carcin* or sarcoma* or adenocarcinoma* or leiomyosarcoma*)).mp.                                       | 57676   |
|                                                                                           |                                                                              | 9 or/1-8                                                                                                                                                                                                    | 355772  |
|                                                                                           |                                                                              | 10 exp Neoplasm Metastasis/                                                                                                                                                                                 | 167751  |
|                                                                                           |                                                                              | 11 metasta*.tw.                                                                                                                                                                                             | 363575  |
|                                                                                           |                                                                              | 12 (advanc* or second* or recurr* or inoperab* or disseminat* or incur*).mp.                                                                                                                                | 2431595 |
|                                                                                           |                                                                              | 13 ((stage or grade or type) adj3 ("3" or "4" or c or d or iii* or iv*)).mp.                                                                                                                                | 293746  |
|                                                                                           |                                                                              | 14 (N1 or N2* or N3* or pN1* or pN2* or pN3*).mp.                                                                                                                                                           | 154534  |
|                                                                                           |                                                                              | 15 or/10-14                                                                                                                                                                                                 | 3038926 |
|                                                                                           |                                                                              | 16 9 and 15                                                                                                                                                                                                 | 126058  |
|                                                                                           |                                                                              | 17 exp Antineoplastic Agents/                                                                                                                                                                               | 893376  |
|                                                                                           |                                                                              | 18 antineoplastic protocols/ or antineoplastic combined chemotherapy protocols/                                                                                                                             | 114570  |
|                                                                                           |                                                                              | 19 chemotherap*.mp.                                                                                                                                                                                         | 366540  |
|                                                                                           |                                                                              | 20 ((drug* or agent* or therap* or treatment*) adj3 (antineoplastic* or cytotoxic*)).mp.                                                                                                                    | 279740  |
|                                                                                           |                                                                              | 21 exp Taxoids/                                                                                                                                                                                             | 28643   |
|                                                                                           |                                                                              | 22 (taxane* or taxoid*).mp.                                                                                                                                                                                 | 14387   |
|                                                                                           |                                                                              | 23 paclitaxel/ or albumin-bound paclitaxel/                                                                                                                                                                 | 21205   |
|                                                                                           |                                                                              | 24 (Paclitaxel or Taxol or Abraxane).mp.                                                                                                                                                                    | 29773   |
|                                                                                           |                                                                              | 25 (Docetaxel or Taxotere).mp.                                                                                                                                                                              | 11909   |
|                                                                                           |                                                                              | 26 exp Anthracyclines/                                                                                                                                                                                      | 57192   |
|                                                                                           |                                                                              | 27 anthracycline*.mp.                                                                                                                                                                                       | 12399   |
|                                                                                           |                                                                              | 28 exp Doxorubicin/                                                                                                                                                                                         | 46160   |

|    |                                                                                 |        |
|----|---------------------------------------------------------------------------------|--------|
| 29 | (Doxorubicin or Adriamycin or Doxil).mp.                                        | 57852  |
| 30 | Epirubicin/                                                                     | 4579   |
| 31 | (Epirubicin or Ellence).mp.                                                     | 6154   |
| 32 | Mitoxantrone/                                                                   | 3922   |
| 33 | (Mitoxantrone or Novantrone).mp.                                                | 5565   |
| 34 | exp Antimetabolites, Antineoplastic/                                            | 134097 |
| 35 | Antimetabolite*.mp.                                                             | 27597  |
| 36 | exp Fluorouracil/                                                               | 40504  |
| 37 | (Fluorouracil or 5-fluorouracil, or 5-FU or Adrucil).mp.                        | 48157  |
| 38 | (Gemcitabine or Gemzar).mp.                                                     | 12175  |
| 39 | Methotrexate/                                                                   | 33518  |
| 40 | (Methotrexate or Mexate or Folex or Rheumatrex).mp.                             | 45872  |
| 41 | Capecitabine/                                                                   | 3234   |
| 42 | (Capecitabine or Xeloda).mp.                                                    | 4892   |
| 43 | exp Alkylating Agents/                                                          | 117188 |
| 44 | Alkylating Agent*.mp.                                                           | 14776  |
| 45 | exp Cyclophosphamide/                                                           | 48958  |
| 46 | (Cyclophosphamide or Cytosan).mp.                                               | 62071  |
| 47 | exp Tubulin Modulators/                                                         | 77359  |
| 48 | (Microtubul* or Antimicrotubular* or Tubulin).mp.                               | 79310  |
| 49 | (Eribulin or Halaven).mp.                                                       | 265    |
| 50 | Epothilones/                                                                    | 756    |
| 51 | Epothilone*.mp.                                                                 | 982    |
| 52 | (Ixabepilone or Ixempra).mp.                                                    | 375    |
| 53 | exp Antibiotics, Antineoplastic/                                                | 135186 |
| 54 | (antibiotic* adj2 (antitumo*r or antineoplastic or cytotoxic)).mp.              | 23528  |
| 55 | Mitomycin/                                                                      | 11152  |
| 56 | (Mutamycin or Mitomycin).mp.                                                    | 18273  |
| 57 | exp Vinca Alkaloids/                                                            | 33625  |
| 58 | (Vinorelbine or Navelbine).mp.                                                  | 3555   |
| 59 | exp Aromatase Inhibitors/                                                       | 6364   |
| 60 | aromatase inhibitor*.mp.                                                        | 7234   |
| 61 | (Letrozole or Femara).mp.                                                       | 2263   |
| 62 | (Anastrozole or Arimidex).mp.                                                   | 1814   |
| 63 | (Exemestane or Aromasin).mp.                                                    | 1094   |
| 64 | Everolimus/                                                                     | 2726   |
| 65 | ((MTOR or mammalian target of rapamycin) adj3 inhibitor*).mp.                   | 5722   |
| 66 | (Everolimus or Afinitor or Zortress).mp.                                        | 4227   |
| 67 | exp Selective Estrogen Receptor Modulators/                                     | 24966  |
| 68 | Selective estrogen receptor modulator*.mp.                                      | 4702   |
| 69 | exp Tamoxifen/                                                                  | 18895  |
| 70 | (Tamoxifen or Soltamox or Nolvadex).mp.                                         | 23395  |
| 71 | exp Estrogen Antagonists/                                                       | 34070  |
| 72 | Estrogen Antagonist*.mp.                                                        | 8049   |
| 73 | (Fulvestrant or Faslodex).mp.                                                   | 2357   |
| 74 | exp Cyclin-Dependent Kinases/ai [Antagonists & Inhibitors]                      | 3770   |
| 75 | (cyclin dependent kinase* adj3 inhibitor*).mp.                                  | 24148  |
| 76 | (Palbociclib or Ibrance).mp.                                                    | 151    |
| 77 | exp Progestins/                                                                 | 63478  |
| 78 | (progestin* or progestrogen* or progestagen* or antiestrogen* or gestagen*).mp. | 27656  |
| 79 | Megestrol Acetate/                                                              | 815    |
| 80 | (Megestrol acetate or Megace).mp.                                               | 1424   |
| 81 | Bendamustine Hydrochloride/                                                     | 429    |
| 82 | (Bendamustine or Treanda or Levact or Ribomustin).mp.                           | 682    |
| 83 | Antibodies, Monoclonal/                                                         | 172191 |
| 84 | exp Vascular Endothelial Growth Factors/ai [Antagonists & Inhibitors]           | 5843   |
| 85 | exp Protein Kinase Inhibitors/                                                  | 59627  |
| 86 | exp Protein-Tyrosine Kinases/ai [Antagonists & Inhibitors]                      | 28643  |

|               |                                                         |                                                                                                                                                                                                                                                                                                                                                                                                                                                                                                                                                                                                                                                                                                                                                                                                                                                                                                                                                                                                                                                                                                                                                                                                                                                                                                                                                                                                                                                                                                                                                                                                                                                                                                                                                                                                                                                                                                                                                                                                                                                                                                                                                                                                                                                                                                                                                                                                                                                                                                                                                                                                               |
|---------------|---------------------------------------------------------|---------------------------------------------------------------------------------------------------------------------------------------------------------------------------------------------------------------------------------------------------------------------------------------------------------------------------------------------------------------------------------------------------------------------------------------------------------------------------------------------------------------------------------------------------------------------------------------------------------------------------------------------------------------------------------------------------------------------------------------------------------------------------------------------------------------------------------------------------------------------------------------------------------------------------------------------------------------------------------------------------------------------------------------------------------------------------------------------------------------------------------------------------------------------------------------------------------------------------------------------------------------------------------------------------------------------------------------------------------------------------------------------------------------------------------------------------------------------------------------------------------------------------------------------------------------------------------------------------------------------------------------------------------------------------------------------------------------------------------------------------------------------------------------------------------------------------------------------------------------------------------------------------------------------------------------------------------------------------------------------------------------------------------------------------------------------------------------------------------------------------------------------------------------------------------------------------------------------------------------------------------------------------------------------------------------------------------------------------------------------------------------------------------------------------------------------------------------------------------------------------------------------------------------------------------------------------------------------------------------|
|               |                                                         | <p>87 monoclonal antibod*.mp. 167315</p> <p>88 ((antagonist* or inhibitor*) adj3 (tyrosine or vascular endothelial growth factor* or VEGF or angiogenesis)).mp. 44551</p> <p>89 (anti VEGF or antiVEGF).mp. 3601</p> <p>90 Bevacizumab/ 7860</p> <p>91 (Bevacizumab or Avastin).mp. 11982</p> <p>92 (Sorafenib or Nexavar).mp. 5191</p> <p>93 (Vandetanib or Caprelsa).mp. 453</p> <p>94 (Sunitinib or Sutent).mp. 4099</p> <p>95 Carboplatin/ 9711</p> <p>96 (Carboplatin or Paraplatin).mp. 13961</p> <p>97 or/17-96 1561145</p> <p>98 16 and 97 44643</p> <p>99 "randomized controlled trial".pt. 408342</p> <p>100 (random* or placebo* or single blind* or double blind* or triple blind*).ti,ab. 893683</p> <p>101 (retraction of publication or retracted publication).pt. 8577</p> <p>102 99 or 100 or 101 987433</p> <p>103 (animals not humans).sh. 4161827</p> <p>104 ((comment or editorial or meta-analysis or practice-guideline or review or letter or journal correspondence) not "randomized controlled trial").pt. 3544553</p> <p>105 (random sampl\$ or random digit\$ or random effect\$ or random survey or random regression).ti,ab. not "randomized controlled trial".pt. 56813</p> <p>106 102 not (103 or 104 or 105) 732467</p> <p>107 98 and 106 4532</p> <p>108 limit 107 to yr="2014 -Current" 570</p>                                                                                                                                                                                                                                                                                                                                                                                                                                                                                                                                                                                                                                                                                                                                                                                                                                                                                                                                                                                                                                                                                                                                                                                                                                                                            |
| <b>Pubmed</b> | <p>March 2, 2016</p> <p>638 results</p> <p>518-1138</p> | <p>Search (#26 NOT medline[sb]) Filters: Publication date from 2014/01/01 to 2016/12/31</p> <p>Search (#16 AND #20 AND #24) Filters: Publication date from 2014/01/01 to 2016/12/31</p> <p>Search (#16 AND #20 AND #24)</p> <p>Search (#22 NOT #23)</p> <p>Search (animals [mh] NOT humans [mh])</p> <p>Search ((((((groups [tiab]) OR trial [tiab]) OR randomly [tiab]) OR drug therapy [sh]) OR placebo [tiab]) OR randomized [tiab]) OR controlled clinical trial [pt]) OR randomized controlled trial [pt])</p> <p>Search (#17 OR #18 OR #19)</p> <p>Search (((antiestrogen* or gestagen* or Carboplatin or Paraplatin or Sunitinib or Sutent or Vandetanib or Caprelsa or Sorafenib or Nexavar or Bevacizumab or Avastin or anti VEGF or antiVEGF or monoclonal antibod* or Bendamustine or Treanda or Levact or Ribomustin or Megestrol or Megace or progestin* or progesterogen* or progestagen* or Palbociclib or lbrance or fulvestrant or faslodex or estrogen antagonist* or Tamoxifen or Soltamox or Nolvadex or selective estrogen receptor modulator* or Everolimus or Afinitor or Zortress or rapamycin inhibitor* or MTOR inhibitor* or Exemestane or Aromasin or Anastrozole or Arimidex or Letrozole or Femara or aromatase inhibitor* or Vinorelbine or Navelbine or Vinca Alkaloid* or Mutamycin or Mitomycin or Ixabepilone or Ixempra or Epothilone* or Eribulin or Halaven or Microtubul* or Antimicrotubular* or Tubulin or Cyclophosphamide or Cytoxan or Alkylating Agent* or Capecitabine or Xeloda or Methotrexate or Mexate or Folex or Rheumatrex or Gemcitabine or Gemzar or Fluorouracil or 5-fluorouracil or 5-FU or Adrucil or Antimetabolite* or Mitoxantrone or Novantrone or Epirubicin or Ellence or Doxorubicin or Adriamycin or Doxil or anthracycline* or Docetaxel or Taxotere or Paclitaxel or Taxol or Abraxane or taxane* or taxoid*)) OR ((antagonist* or inhibitor*) AND (tyrosine or vascular endothelial growth factor* or VEGF or angiogenesis)))) OR (cyclin dependent kinase* AND inhibitor*) OR (antibiotic* AND (antitumor or antitumour or antineoplastic or cytotoxic)))</p> <p>Search chemotherap*</p> <p>Search ((drug* or agent* or therap* or treatment* or protocol*) AND (antineoplastic* or cytotoxic*))</p> <p>Search (#15 AND #9)</p> <p>Search (#10 OR #11 OR #12 OR #13 OR #14)</p> <p>Search (N1 or N2* or N3* or pN1* or pN2* or pN3*)</p> <p>Search ((stage or grade or type) AND ("3" or "4" or c or d or iii* or iv*))</p> <p>Search (advanc* or second* or recurr* or inoperab* or disseminat* or incur*)</p> <p>Search metasta*</p> |

|                    |                                                                                   |                                                                                                                                                                                                                                                                                                                                                                                                                                                                                                                                                                                                                                                                                                                                                                                                                                                                                                                                                                                                                                                                                                                                                                                                                                                                                                                                                                                                                                                                                                                                                                                                                                                                                                                                                                                                                                                                                                                                                                                                                                                                                                                                                                                                                                                                                                                                                                                                                                                                                                                                                                                                                                                                 |  |
|--------------------|-----------------------------------------------------------------------------------|-----------------------------------------------------------------------------------------------------------------------------------------------------------------------------------------------------------------------------------------------------------------------------------------------------------------------------------------------------------------------------------------------------------------------------------------------------------------------------------------------------------------------------------------------------------------------------------------------------------------------------------------------------------------------------------------------------------------------------------------------------------------------------------------------------------------------------------------------------------------------------------------------------------------------------------------------------------------------------------------------------------------------------------------------------------------------------------------------------------------------------------------------------------------------------------------------------------------------------------------------------------------------------------------------------------------------------------------------------------------------------------------------------------------------------------------------------------------------------------------------------------------------------------------------------------------------------------------------------------------------------------------------------------------------------------------------------------------------------------------------------------------------------------------------------------------------------------------------------------------------------------------------------------------------------------------------------------------------------------------------------------------------------------------------------------------------------------------------------------------------------------------------------------------------------------------------------------------------------------------------------------------------------------------------------------------------------------------------------------------------------------------------------------------------------------------------------------------------------------------------------------------------------------------------------------------------------------------------------------------------------------------------------------------|--|
|                    |                                                                                   | <p>Search Neoplasm Metastasis[MeSH Terms]<br/> Search ((#1 OR #2 OR #3 OR #4 OR #5 OR #6 OR #8))<br/> Search (((breast* or mammar*) AND (cancer* or neoplasm* or tumour* or tumor* or oncolog* or malignan* or carcinoma* or sarcoma* or adenocarcinoma* or leiomyosarcoma* or dcis or duct* or infiltrat* or intraduct* or lobul* or medullary or tubular)))<br/> Search ((paget* AND (breast* OR mammary OR nipple*)))<br/> Search paget's disease, mammary[MeSH Terms]<br/> Search "neoplasms, ductal, lobular, and medullary"[MeSH Terms]<br/> Search carcinoma, intraductal, noninfiltrating[MeSH Terms]<br/> Search carcinoma, lobular[MeSH Terms]<br/> Search Breast Neoplasms[MeSH Terms]</p>                                                                                                                                                                                                                                                                                                                                                                                                                                                                                                                                                                                                                                                                                                                                                                                                                                                                                                                                                                                                                                                                                                                                                                                                                                                                                                                                                                                                                                                                                                                                                                                                                                                                                                                                                                                                                                                                                                                                                           |  |
| <b>OVID EMBASE</b> | <p>March 4, 2016</p> <p>975 results</p> <p>record # 1139-1994 &amp; 2559-2600</p> | <p>1 exp *breast tumor/ 236202</p> <p>2 *breast cancer/ 157207</p> <p>3 *basal like breast cancer/ or *breast adenocarcinoma/ or *breast carcinogenesis/ or *breast carcinoma/ or *breast sarcoma/ or exp *estrogen receptor positive breast cancer/ or *"hereditary breast and ovarian cancer syndrome"/ or *inflammatory breast cancer/ or *intraductal carcinoma/ or *paget nipple disease/ or *progesterone receptor positive breast cancer/ 37272</p> <p>4 (paget* and (breast* or mammary or nipple*)).tw. 1072</p> <p>5 ((breast* or mammar*) adj5 (cancer* or neoplasm* or tumor?* or oncolog* or malignan* or carcinoma* or sarcoma* or adenocarcinoma* or leiomyosarcoma* or dcis or infiltrat* or medullary or tubular)).mp. 414137</p> <p>6 ((lobul* or duct* or intraduct*) adj5 (cancer* or neoplasm* or tumor?* or oncolog* or malignan* or carcin* or sarcoma* or adenocarcinoma* or leiomyosarcoma*)).mp. 67534</p> <p>7 or/1-6 455770</p> <p>8 *metastasis/ 38534</p> <p>9 metasta*.tw. 452114</p> <p>10 (advanc* or second* or recurr* or inoperab* or disseminat* or incur*).mp. 2775188</p> <p>11 ((stage or grade or type) adj3 ("3" or "4" or c or d or iii* or iv*)).mp. 351190</p> <p>12 (N1 or N2* or N3* or pN1* or pN2* or pN3*).mp. 259462</p> <p>13 or/8-12 3453702</p> <p>14 7 and 13 175151</p> <p>15 *breast metastasis/ 4687</p> <p>16 14 or 15 175298</p> <p>17 exp *antineoplastic agent/ 602681</p> <p>18 exp *chemotherapy/ 93876</p> <p>19 chemotherap*.mp. 545008</p> <p>20 ((drug* or agent* or therap* or treatment* or protocol*) adj3 (antineoplastic* or cytotoxic*)).mp. 277990</p> <p>21 (taxane* or taxoid*).mp. 21401</p> <p>22 (Paclitaxel or Taxol or Abraxane).mp. 81330</p> <p>23 (Docetaxel or Taxotere).mp. 42750</p> <p>24 anthracycline*.mp. 28324</p> <p>25 (Doxorubicin or Adriamycin or Doxil).mp. 135142</p> <p>26 (Epirubicin or Ellence).mp. 23719</p> <p>27 (Mitoxantrone or Novantrone).mp. 20033</p> <p>28 Antimetabolite*.mp. 8575</p> <p>29 (Fluorouracil or 5-fluorouracil or 5-FU or Adrucil).mp. 102735</p> <p>30 (Gemcitabine or Gemzar).mp. 40999</p> <p>31 (Methotrexate or Mexate or Folex or Rheumatrex).mp. 124507</p> <p>32 (Capecitabine or Xeloda).mp. 21195</p> <p>33 Alkylating Agent*.mp. 16712</p> <p>34 (Cyclophosphamide or Cytoxan).mp. 152370</p> <p>35 (Microtubul* or Antimicrotubular* or Tubulin).mp. 77563</p> <p>36 (Eribulin or Halaven).mp. 1033</p> <p>37 Epothilone*.mp. 2086</p> <p>38 (Ixabepilone or Ixemptra).mp. 1565</p> <p>39 (antibiotic* adj2 (antitumo?r or antineoplastic or cytotoxic)).mp. 5777</p> <p>40 (Mutamycin or Mitomycin).mp. 32659</p> |  |

|    |                                                                                                                  |         |
|----|------------------------------------------------------------------------------------------------------------------|---------|
| 41 | (Vinorelbine or Navelbine).mp.                                                                                   | 15070   |
| 42 | aromatase inhibitor*.mp.                                                                                         | 13587   |
| 43 | (Letrozole or Femara).mp.                                                                                        | 8590    |
| 44 | (Anastrozole or Arimidex).mp.                                                                                    | 7743    |
| 45 | (Exemestane or Aromasin).mp.                                                                                     | 4768    |
| 46 | MTOR inhibitor*.mp.                                                                                              | 8071    |
| 47 | mammalian target of rapamycin inhibitor*.mp.                                                                     | 8383    |
| 48 | (Everolimus or Afinitor or Zortress).mp.                                                                         | 18512   |
| 49 | Selective estrogen receptor modulator*.mp.                                                                       | 7824    |
| 50 | (Tamoxifen or Soltamox or Nolvadex).mp.                                                                          | 50959   |
| 51 | Estrogen Antagonist*.mp.                                                                                         | 751     |
| 52 | (Fulvestrant or Faslodex).mp.                                                                                    | 6317    |
| 53 | histone deacetylase inhibitor*.mp.                                                                               | 15470   |
| 54 | (cyclin dependent kinase* adj3 inhibitor*).mp.                                                                   | 24106   |
| 55 | (Palbociclib or Ibrance).mp.                                                                                     | 526     |
| 56 | (progestin* or progesterone* or progestagen*).mp.                                                                | 11861   |
| 57 | (Megestrol or Megace).mp.                                                                                        | 4792    |
| 58 | (Bendamustine or Treanda or Levact or Ribomustin).mp.                                                            | 3480    |
| 59 | monoclonal antibody*.mp.                                                                                         | 234578  |
| 60 | ((antagonist* or inhibitor*) adj2 (tyrosine or vascular endothelial growth factor* or VEGF or angiogenesis)).mp. | 59723   |
| 61 | (anti VEGF or antiVEGF).mp.                                                                                      | 5534    |
| 62 | (Bevacizumab or Avastin).mp.                                                                                     | 40222   |
| 63 | (Sorafenib or Nexavar).mp.                                                                                       | 19746   |
| 64 | (Vandetanib or Caprelsa).mp.                                                                                     | 3545    |
| 65 | (Sunitinib or Sutent).mp.                                                                                        | 16336   |
| 66 | (Carboplatin or Paraplatin).mp.                                                                                  | 52432   |
| 67 | antiestrogen*.mp.                                                                                                | 10796   |
| 68 | gestagen*.mp.                                                                                                    | 19283   |
| 69 | or/17-68                                                                                                         | 1598388 |
| 70 | 16 and 69                                                                                                        | 78983   |
| 71 | random*.ti,ab.                                                                                                   | 1008885 |
| 72 | factorial*.ti,ab.                                                                                                | 25172   |
| 73 | (crossover* or cross over*).ti,ab.                                                                               | 70814   |
| 74 | ((doubl* or singl*) adj blind*).ti,ab.                                                                           | 155779  |
| 75 | (assign* or allocat* or volunteer* or placebo*).ti,ab.                                                           | 698087  |
| 76 | crossover procedure/                                                                                             | 46186   |
| 77 | double blind procedure/                                                                                          | 119534  |
| 78 | single blind procedure/                                                                                          | 21588   |
| 79 | randomized controlled trial/                                                                                     | 379496  |
| 80 | 71 or 72 or 73 or 74 or 75 or 76 or 77 or 78 or 79                                                               | 1548071 |
| 81 | animal/ not human/                                                                                               | 675529  |
| 82 | nonhuman/                                                                                                        | 4211541 |
| 83 | exp animal experiment/                                                                                           | 1405919 |
| 84 | exp experimental animal/                                                                                         | 448483  |
| 85 | animal model/                                                                                                    | 829126  |
| 86 | exp rodent/                                                                                                      | 2317514 |
| 87 | (rat or rats or mouse or mice).ti.                                                                               | 947238  |
| 88 | 81 or 82 or 83 or 84 or 85 or 86 or 87                                                                           | 5293256 |
| 89 | 80 not 88                                                                                                        | 1306055 |
| 90 | 70 and 89                                                                                                        | 10550   |
| 91 | limit 90 to yr="2014 -Current"                                                                                   | 1819    |
| 92 | limit 91 to (conference abstract or conference paper or conference proceeding or "conference review")<br>844     |         |
| 93 | 91 not 92                                                                                                        | 975     |

|                                                                                                      |                  |                                                                                                                                                                                                                                                                                                                                                                                                                                                                                                                                                                                                                                                                                                                                                                                                                                                                                                                                                                                                                                                                                                                                                                                                                                                                                                                                                                                                                                                                                                                                                                                                                                                                                                                                                                                                                                                                                                                                                                                                                                                                                                                                                                                                                                                                                                                                                                                                                                                                                                                                                                                                                                                                                                                                                                                                                                                                                                                                                                                                                                                                                                                               |                                                                                                                                                                                                                                                                                                                                                                                                              |
|------------------------------------------------------------------------------------------------------|------------------|-------------------------------------------------------------------------------------------------------------------------------------------------------------------------------------------------------------------------------------------------------------------------------------------------------------------------------------------------------------------------------------------------------------------------------------------------------------------------------------------------------------------------------------------------------------------------------------------------------------------------------------------------------------------------------------------------------------------------------------------------------------------------------------------------------------------------------------------------------------------------------------------------------------------------------------------------------------------------------------------------------------------------------------------------------------------------------------------------------------------------------------------------------------------------------------------------------------------------------------------------------------------------------------------------------------------------------------------------------------------------------------------------------------------------------------------------------------------------------------------------------------------------------------------------------------------------------------------------------------------------------------------------------------------------------------------------------------------------------------------------------------------------------------------------------------------------------------------------------------------------------------------------------------------------------------------------------------------------------------------------------------------------------------------------------------------------------------------------------------------------------------------------------------------------------------------------------------------------------------------------------------------------------------------------------------------------------------------------------------------------------------------------------------------------------------------------------------------------------------------------------------------------------------------------------------------------------------------------------------------------------------------------------------------------------------------------------------------------------------------------------------------------------------------------------------------------------------------------------------------------------------------------------------------------------------------------------------------------------------------------------------------------------------------------------------------------------------------------------------------------------|--------------------------------------------------------------------------------------------------------------------------------------------------------------------------------------------------------------------------------------------------------------------------------------------------------------------------------------------------------------------------------------------------------------|
| <b>EBM<br/>Reviews:</b><br><br><b>CENTRAL</b><br><br>685<br>results<br><br>record #<br>1995-<br>2541 | March 4,<br>2016 | 1 (paget* and (breast* or mammary or nipple*)).ti,ab,kw,sh.<br>2 ((breast* or mammar*) adj5 (cancer* or neoplasm* or tumo?* or oncolog* or malignan* or carcin* or sarcoma* or adenocarcinoma* or leiomyosarcoma* or dcis or infiltrat* or medullary or tubular)).ti,ab,kw,sh.<br>3 ((lobul* or duct* or intraduct*) adj5 (cancer* or neoplasm* or tumo?* or oncolog* or malignan* or carcin* or sarcoma* or adenocarcinoma* or leiomyosarcoma*)).ti,ab,kw,sh.<br>4 1 or 2 or 3<br>5 metasta*.ti,ab,kw,sh.<br>6 (advanc* or second* or recurr* or inoperab* or disseminat* or incur*).ti,ab,kw,sh.<br>7 ((stage or grade or type) adj3 ("3" or "4" or c or d or iii* or iv*)).ti,ab,kw,sh.<br>8 (N1 or N2* or N3* or pN1* or pN2* or pN3*).ti,ab,kw,sh.<br>9 or/5-8<br>10 chemotherap*.ti,ab,kw,sh.<br>11 ((drug* or agent* or therap* or treatment* or protocol*) adj3 (antineoplastic* or cytotoxic*)).ti,ab,kw,sh.<br>12 (taxane* or taxoid*).ti,ab,kw,sh.<br>13 (Paclitaxel or Taxol or Abraxane).ti,ab,kw,sh.<br>14 (Docetaxel or Taxotere).ti,ab,kw,sh.<br>15 anthracycline*.ti,ab,kw,sh.<br>16 (Doxorubicin or Adriamycin or Doxil).ti,ab,kw,sh.<br>17 (Epirubicin or Ellence).ti,ab,kw,sh.<br>18 (Mitoxantrone or Novantrone).ti,ab,kw,sh.<br>19 Antimetabolite*.ti,ab,kw,sh.<br>20 (Fluorouracil or 5-fluorouracil or 5-FU or Adrucil).ti,ab,kw,sh.<br>21 (Gemcitabine or Gemzar).ti,ab,kw,sh.<br>22 (Methotrexate or Mexate or Folex or Rheumatrex).ti,ab,kw,sh.<br>23 (Capecitabine or Xeloda).ti,ab,kw,sh.<br>24 Alkylating Agent*.ti,ab,kw,sh.<br>25 (Cyclophosphamide or Cytoxan).ti,ab,kw,sh.<br>26 (Microtubul* or Antimicrotubular* or Tubulin).ti,ab,kw,sh.<br>27 (Eribulin or Halaven).ti,ab,kw,sh.<br>28 Epothilone*.ti,ab,kw,sh.<br>29 (Ixabepilone or Ixempra).ti,ab,kw,sh.<br>30 (antibiotic* adj2 (antitumo?r or antineoplastic or cytotoxic)).ti,ab,kw,sh.<br>31 (Mutamycin or Mitomycin).ti,ab,kw,sh.<br>32 (Vinorelbine or Navelbine).ti,ab,kw,sh.<br>33 aromatase inhibitor*.ti,ab,kw,sh.<br>34 (Letrozole or Femara).ti,ab,kw,sh.<br>35 (Anastrozole or Arimidex).ti,ab,kw,sh.<br>36 (Exemestane or Aromasin).ti,ab,kw,sh.<br>37 MTOR inhibitor*.ti,ab,kw,sh.<br>38 mammalian target of rapamycin inhibitor*.ti,ab,kw,sh.<br>39 (Everolimus or Afinitor or Zortress).ti,ab,kw,sh.<br>40 Selective estrogen receptor modulator*.ti,ab,kw,sh.<br>41 (Tamoxifen or Soltamox or Nolvadex).ti,ab,kw,sh.<br>42 Estrogen Antagonist*.ti,ab,kw,sh.<br>43 (Fulvestrant or Faslodex).ti,ab,kw,sh.<br>44 histone deacetylase inhibitor*.ti,ab,kw,sh.<br>45 (cyclin dependent kinase* adj3 inhibitor*).ti,ab,kw,sh.<br>46 (Palbociclib or Ibrance).ti,ab,kw,sh.<br>47 (progestin* or progestrogen* or progestagen*).ti,ab,kw,sh.<br>48 (Megestrol or Megace).ti,ab,kw,sh.<br>49 (Bendamustine or Treanda or Levact or Ribomustin).ti,ab,kw,sh.<br>50 monoclonal antibod*.ti,ab,kw,sh.<br>51 ((antagonist* or inhibitor*) adj2 (tyrosine or vascular endothelial growth factor* or VEGF or angiogenesis)).ti,ab,kw,sh.<br>52 (anti VEGF or antiVEGF).ti,ab,kw,sh.<br>53 (Bevacizumab or Avastin).ti,ab,kw,sh. | 15<br>18102<br>693<br>18435<br>14598<br>145795<br>20252<br>20905<br>178741<br>30860<br>10042<br>1588<br>3688<br>2572<br>1277<br>5282<br>1818<br>875<br>1159<br>7059<br>1904<br>5589<br>1168<br>360<br>7068<br>162<br>48<br>52<br>62<br>29<br>1994<br>803<br>945<br>719<br>600<br>392<br>216<br>159<br>1221<br>488<br>3365<br>360<br>160<br>69<br>34<br>16<br>1347<br>426<br>81<br>3027<br>899<br>210<br>1581 |
|------------------------------------------------------------------------------------------------------|------------------|-------------------------------------------------------------------------------------------------------------------------------------------------------------------------------------------------------------------------------------------------------------------------------------------------------------------------------------------------------------------------------------------------------------------------------------------------------------------------------------------------------------------------------------------------------------------------------------------------------------------------------------------------------------------------------------------------------------------------------------------------------------------------------------------------------------------------------------------------------------------------------------------------------------------------------------------------------------------------------------------------------------------------------------------------------------------------------------------------------------------------------------------------------------------------------------------------------------------------------------------------------------------------------------------------------------------------------------------------------------------------------------------------------------------------------------------------------------------------------------------------------------------------------------------------------------------------------------------------------------------------------------------------------------------------------------------------------------------------------------------------------------------------------------------------------------------------------------------------------------------------------------------------------------------------------------------------------------------------------------------------------------------------------------------------------------------------------------------------------------------------------------------------------------------------------------------------------------------------------------------------------------------------------------------------------------------------------------------------------------------------------------------------------------------------------------------------------------------------------------------------------------------------------------------------------------------------------------------------------------------------------------------------------------------------------------------------------------------------------------------------------------------------------------------------------------------------------------------------------------------------------------------------------------------------------------------------------------------------------------------------------------------------------------------------------------------------------------------------------------------------------|--------------------------------------------------------------------------------------------------------------------------------------------------------------------------------------------------------------------------------------------------------------------------------------------------------------------------------------------------------------------------------------------------------------|

|  |    |                                          |       |
|--|----|------------------------------------------|-------|
|  | 54 | (Sorafenib or Nexavar).ti,ab,kw,sh.      | 435   |
|  | 55 | (Vandetanib or Caprelsa).ti,ab,kw,sh.    | 67    |
|  | 56 | (Sunitinib or Sutent).ti,ab,kw,sh.       | 306   |
|  | 57 | (Carboplatin or Paraplatin).ti,ab,kw,sh. | 2702  |
|  | 58 | antiestrogen*.ti,ab,kw,sh.               | 280   |
|  | 59 | gestagen*.ti,ab,kw,sh.                   | 231   |
|  | 60 | or/10-59                                 | 57958 |
|  | 61 | 4 and 9 and 60                           | 6624  |
|  | 62 | limit 61 to yr="2014 -Current"           | 685   |



## Appendix B: PICOS Eligibility Criteria

**Table 1:** Summary of PICOS Eligibility Criteria for the Systematic Review and NMA

| Item                                | Description                                                                                                                                                                                                                                                                                                                                                                                                                                                                                                                                                                                                                                                                                                                                                                                                                                                                                                                                                                                                                                                                                                             |
|-------------------------------------|-------------------------------------------------------------------------------------------------------------------------------------------------------------------------------------------------------------------------------------------------------------------------------------------------------------------------------------------------------------------------------------------------------------------------------------------------------------------------------------------------------------------------------------------------------------------------------------------------------------------------------------------------------------------------------------------------------------------------------------------------------------------------------------------------------------------------------------------------------------------------------------------------------------------------------------------------------------------------------------------------------------------------------------------------------------------------------------------------------------------------|
| <b>Population</b>                   | Postmenopausal women with HR+/HER2- ABC/MBC receiving first- or second-line therapy for their disease.                                                                                                                                                                                                                                                                                                                                                                                                                                                                                                                                                                                                                                                                                                                                                                                                                                                                                                                                                                                                                  |
| <b>Intervention/<br/>Index Node</b> | <ul style="list-style-type: none"> <li>• <b>First-line:</b> Palbociclib 125 mg daily (3 weeks on and 1 week off) + Letrozole 2.5 mg daily</li> <li>• <b>Second-line:</b> Palbociclib 125 mg daily (3 weeks on and 1 week off) + Fulvestrant 500 mg (every 14 days for first 3 injections, then every 28 days)</li> </ul>                                                                                                                                                                                                                                                                                                                                                                                                                                                                                                                                                                                                                                                                                                                                                                                                |
| <b>Comparators**</b>                | <p>Endocrine-based therapies, chemotherapy agents, and/or chemotherapy agents + biological therapies:</p> <ul style="list-style-type: none"> <li>• <b>First-line:</b> anastrozole, bevacizumab, capecitabine, carboplatin*, cyclophosphamide, docetaxel, epirubicin, everolimus, exemestane, fluorouracil, gemcitabine, letrozole, liposomal doxorubicin, megestrol acetate*, methotrexate, mitoxantrone*, paclitaxel*, sunitinib, tamoxifen, vinorelbine</li> <li>• <b>Second-line:</b> aminoglutethimide, anastrozole, bevacizumab, capecitabine, carboplatin, corticosteroid, cyclophosphamide, docetaxel, doxorubicin, epirubicin, everolimus, exemestane, fluorouracil, fulvestrant, gemcitabine, ixabepilone, letrozole, megestrol acetate, methotrexate, mitoxantrone, motesanib, nab-paclitaxel, paclitaxel, pegylated liposomal doxorubicin, sorafenib, sunitinib, vinorelbine</li> <li>• Bendamustine hydrochloride, mutamycin, and vandetanib were also considered as comparators, but did not end up being included in final evidence networks</li> <li>• Any combination of the above therapies</li> </ul> |
| <b>Outcomes</b>                     | <ul style="list-style-type: none"> <li>• PFS/TTP</li> </ul>                                                                                                                                                                                                                                                                                                                                                                                                                                                                                                                                                                                                                                                                                                                                                                                                                                                                                                                                                                                                                                                             |
| <b>Study design</b>                 | <ul style="list-style-type: none"> <li>• Randomized, controlled, prospective clinical trials (phase 2 and 3 RCTs)</li> <li>• Abstracts (e.g., conference abstracts)</li> </ul>                                                                                                                                                                                                                                                                                                                                                                                                                                                                                                                                                                                                                                                                                                                                                                                                                                                                                                                                          |

ABC/MBC = advanced/metastatic breast cancer; ER+ = estrogen receptor-positive; HER2- = human epidermal growth factor receptor 2-negative; HR+ = hormone receptor-positive; PFS = progression-free survival; RCT = randomized controlled trial; TTP = time to progression.

\*These therapies were included in first-line networks as forced connections based on line of therapy.

\*\*Comparators are separated by line of therapy based on the evidence networks used in the primary analyses.

## Appendix C: Summary of Study and Patient Baseline Characteristics and Prior Therapies

**Table 2:** Summary of Study and Patient Characteristics Included in Network Meta-Analysis for First-Line PFS/TTP

| Study                  | Treatments       | Blinding | Analysis Population | FUP (median months) | N total | Median age (yrs) | Post-menopausal (%) | ER+ (%) | PgR+ (%) | HR+ (%) | HER2- (%) | Visceral metastases (%) |
|------------------------|------------------|----------|---------------------|---------------------|---------|------------------|---------------------|---------|----------|---------|-----------|-------------------------|
| Bonneterre 2004 [1]    | DOC + EPI        | OL       | ITT                 | 23.8                | 70      | 54               | NR                  | 54      | 51       | NR      | NR        | NR                      |
|                        | FEC              | OL       | ITT                 | 23.8                | 72      | 54               | NR                  | 67      | 60       | NR      | NR        | NR                      |
| Cinieri 2014 [2]       | CAP + VIN        | OL       | ITT                 | NR                  | 49      | 58               | NR                  | NR      | NR       | 61      | 100       | 80                      |
|                        | PAC + GEM        | OL       | ITT                 | NR                  | 50      | 56               | NR                  | NR      | NR       | 50      | 100       | 82                      |
|                        | DOC + GEM        | OL       | ITT                 | NR                  | 50      | 57               | NR                  | NR      | NR       | 66      | 100       | 74                      |
| Finn 2015** [3]        | PAL + LET 2.5    | OL       | ITT                 | 29.6                | 84      | 63               | 100                 | 100     | NR       | 100     | 100       | 44                      |
|                        | LET 2.5          | OL       | ITT                 | 27.9                | 81      | 64               | 100                 | 100     | NR       | 100     | 100       | 53                      |
| Finn 2016 [4]          | PAL + LET 2.5    | DB       | ITT                 | 23                  | 666     | 62               | 100                 | 100     | NR       | 100     | 100       | 49.3                    |
|                        | LET 2.5          | DB       | ITT                 | 23                  |         | 62               | 100                 | 100     | NR       | 100     | 100       |                         |
| Miles 2010 [5]         | DOC              | DB       | ITT                 | 25                  | 241     | 55               | NR                  | NR      | NR       | 78      | 100       | NR                      |
|                        | DOC + BEVA 7.5   | DB       | ITT                 | 25                  | 248     | 54               | NR                  | NR      | NR       | 78      | 100       | NR                      |
|                        | DOC + BEVA 15    | DB       | ITT                 | 25                  | 247     | 55               | NR                  | NR      | NR       | 76      | 100       | NR                      |
| Mouridsen 2001 [6]     | LET 2.5          | DB       | ITT                 | 18                  | 453     | 65               | 100                 | NR      | NR       | 65      | NR        | 43                      |
|                        | TAM              | DB       | ITT                 | 18                  | 454     | 64               | 100                 | NR      | NR       | 67      | NR        | 46                      |
| Nabholtz 2000 [7]      | ANA 1            | DB       | ITT                 | 17.7                | 171     | 68               | 100                 | 84.8    | 67.3     | 88.3    | NR        | 48.5                    |
|                        | TAM              | DB       | ITT                 | 17.7                | 182     | 67               | 100                 | 85.7    | 69.8     | 88.9    | NR        | 47.8                    |
| O'Shaughnessy 2001 [8] | CAP              | OL       | mITT                | NR                  | 62      | 69               | 100                 | NR      | NR       | NR      | NR        | NR                      |
|                        | CMF              | OL       | mITT                | NR                  | 33      | 70               | 100                 | NR      | NR       | NR      | NR        | NR                      |
| Paridaens 2008 [9]     | EXE              | OL       | ITT                 | 29                  | 182     | 63               | 100                 | 87.9    | 61.5     | 92.3    | NR        | 47.8                    |
|                        | TAM              | OL       | ITT                 | 29                  | 189     | 62               | 100                 | 89.4    | 60.8     | 94.2    | NR        | 46.6                    |
| Robert 2011a [10]      | PAC + SUN        | OL       | ITT                 | 8.1                 | 242     | 57               | NR                  | NR      | NR       | 76      | 97        | NR                      |
|                        | PAC + BEVA       | OL       | ITT                 | 8.1                 | 243     | 57               | NR                  | NR      | NR       | 76      | 97        | NR                      |
| Robert 2011b [11]      | CAP              | DB       | ITT                 | 15.6                | 206     | 57               | NR                  | NR      | NR       | 73.7    | 95.1      | 71.4                    |
|                        | CAP + BEVA       | DB       | ITT                 | 15.6                | 409     | 56               | NR                  | NR      | NR       | 77.4    | 95.8      | 67.5                    |
| Robertson 2012** [12]  | FUL 500          | OL       | ITT                 | 18.8                | 102     | 66               | Yes                 | 96.1    | 80.4     | 100     | 47.1      | 47.1                    |
|                        | ANA 1            | OL       | ITT                 | 12.9                | 103     | 68               | Yes                 | 97.0    | 78.6     | 100     | 47.6      | 56.3                    |
| Vici 2011 [13]         | DOC + GEM        | NR       | ITT                 | NR                  | 36      | 61               | 72.2                | NR      | NR       | 69.4    | 52.8      | 50                      |
|                        | DOC + CAP        | NR       | ITT                 | NR                  | 36      | 63               | 77.8                | NR      | NR       | 72.2    | 55.6      | 50                      |
| Welt 2016 [14]         | CAP + BEVA       | OL       | mITT                | 22.2                | 297     | NR               | 81.8                | NR      | NR       | 79.5    | 99.3      | 78.1                    |
|                        | CAP + BEVA + VIN | OL       | mITT                | 23.6                | 295     | NR               | 81.7                | NR      | NR       | 79      | 99.3      | 76.3                    |
| Yardley 2009 [15]      | LIP DOX          | NR       | ITT                 | NR                  | 50      | 62               | NR                  | 78      | NR       | NR      | NR        | 88                      |
|                        | DOC              | NR       | ITT                 | NR                  | 52      | 63               | NR                  | 63      | NR       | NR      | NR        | 87                      |

|                                                                |                  |    |          |      |     |      |     |      |      |      |      |      |
|----------------------------------------------------------------|------------------|----|----------|------|-----|------|-----|------|------|------|------|------|
| <b>Yardley 2015 [16]</b>                                       | PAC + BEVA + EVE | NR | ITT      | 16   | 56  | 61   | NR  | NR   | NR   | 79   | 100  | NR   |
|                                                                | PAC + BEVA       | NR | ITT      | 16   | 57  | 57   | NR  | NR   | NR   | 79   | 100  | NR   |
| <b>Forced Second-line Connections</b>                          |                  |    |          |      |     |      |     |      |      |      |      |      |
| <b>Bachelot 2011 [17]</b>                                      | DOC + CAP        | NR | ITT      | 42   | 33  | 57   | 64  | 85   | NR   | NR   | 100  | NR   |
|                                                                | DOC + EPI        | NR | ITT      | 42   | 35  | 59   | 71  | 82   | NR   | NR   | 100  | NR   |
| <b>Dixon 1992* [18]</b>                                        | MGA              | NR | ITT      | NR   | 30  | 64   | 100 | 27   | NR   | NR   | NR   | 30   |
|                                                                | MITOX            | NR | ITT      | NR   | 30  | 61   | 100 | 20   | NR   | NR   | NR   | 30   |
| <b>Fountzilas 2009 [19]</b>                                    | PAC + CARBO      | NR | ITT      | 34   | 136 | 60   | 82  | 65   | NR   | NR   | 57   | 71   |
|                                                                | DOC + GEM        | NR | ITT      | 34   | 144 | 60   | 76  | 67   | NR   | NR   | 56   | 71   |
|                                                                | PAC              | NR | ITT      | 34   | 136 | 60.5 | 79  | 71   | NR   | NR   | 60   | 76.5 |
| <b>Ghosn 2011 [20]</b>                                         | CAP + VIN        | OL | ITT      | NR   | 41  | 51   | NR  | 78   | 65.9 | NR   | 100  | NR   |
|                                                                | DOC              | OL | ITT      | NR   | 29  | 57   | NR  | 72.4 | 62.1 | NR   | 100  | NR   |
| <b>Heidemann 2002 [21]</b>                                     | MITOX            | NR | Efficacy | 13.6 | 119 | NR   | NR  | 43   | 35   | 48   | NR   | NR   |
|                                                                | FEC              | NR | Efficacy | 13.6 | 119 | NR   | NR  | 58   | 48   | 60   | NR   | NR   |
| <b>Kaufmann 2000 [22]</b>                                      | EXE              | DB | ITT      | 11.3 | 366 | 65   | 100 | NR   | NR   | 67.2 | NR   | 56.6 |
|                                                                | MGA              | DB | ITT      | 11.3 | 403 | 65   | 100 | NR   | NR   | 68   | NR   | 59.3 |
| <b>Miller 2007 [23]</b>                                        | PAC + BEVA       | OL | ITT      | 41.6 | 347 | 56   | NR  | 59.9 | 44.7 | NR   | 92.5 | 79.5 |
|                                                                | PAC              | OL | ITT      | 43.5 | 326 | 55   | NR  | 62.9 | 45.1 | NR   | 89.9 | 87.1 |
| <b>Forced Key Connections Based on Patient Characteristics</b> |                  |    |          |      |     |      |     |      |      |      |      |      |
| <b>Ackland 2001 [24]</b>                                       | FEC              | NR | ITT      | 21   | 223 | 56   | 75  | 17   | NR   | NR   | NR   | 57   |
|                                                                | CMF              | NR | ITT      | 19   | 237 | 55   | 69  | 14   | NR   | NR   | NR   | 60   |

ANA 1 = anastrozole 1 mg; BEVA = bevacizumab; CAP = capecitabine; CARBO = carboplatin; CMF = cyclophosphamide + methotrexate + 5-fluorouracil; DB = double blind; DOC = docetaxel; EPI = epirubicin; ER+ = estrogen receptor-positive; EVE = everolimus; EXE = exemestane; FEC = fluorouracil + epirubicin + cyclophosphamide; FUP = follow-up; GEM = gemcitabine; HER2- = human epidermal growth factor receptor type 2-negative; HR+ = hormone receptor-positive; ITT = intention-to-treat; LET 2.5 = letrozole 2.5 mg; LIP DOX = liposomal doxorubicin; MGA = megestrol acetate; MITOX = mitoxantrone; mITT = modified intention-to-treat; NR = not reported; OL = open label; PAC = paclitaxel; PgR+ = progesterone receptor-positive; SUN = sunitinib; TAM = tamoxifen; VIN = vinorelbine.

\* Also a forced key connection based on patient characteristics.

\*\*Included in sensitivity analyses only.

**Table 3:** Summary of Study and Patient Characteristics Included in Network Meta-Analysis for Second-line PFS/TTP

| Study                   | Treatments       | Blinding | Analysis Population | FUP (median months) | N total | Median age (yrs) | Post-menopausal (%) | ER+ (%) | PgR+ (%) | HR+ (%) | HER2- (%) | Visceral metastases (%) |
|-------------------------|------------------|----------|---------------------|---------------------|---------|------------------|---------------------|---------|----------|---------|-----------|-------------------------|
| Bachelot 2011 [17]      | DOC + CAP        | NR       | ITT                 | 42                  | 33      | 57               | 64                  | 85      | NR       | NR      | 100       | NR                      |
|                         | DOC + EPI        | NR       | ITT                 | 42                  | 35      | 59               | 71                  | 82      | NR       | NR      | 100       | NR                      |
| Baselga 2012 [25]       | CAP + SOR        | DB       | ITT                 | NR                  | 115     | Mean 55.1        | NR                  | NR      | NR       | 81.7    | 100       | 75.7                    |
|                         | CAP              | DB       | ITT                 | NR                  | 114     | Mean 54.4        | NR                  | NR      | NR       | 69.3    | 100       | 73.7                    |
| Bergh 2012 [26]         | DOC + SUN        | OL       | ITT                 | 18                  | 296     | 54               | NR                  | 74      | 64       | NR      | 100       | 74                      |
|                         | DOC              | OL       | ITT                 | 18                  | 297     | 56               | NR                  | 70      | 54       | NR      | 100       | 70                      |
| Brufsky 2011 [27]       | PAC + BEVA       | OL       | ITT                 | 14.6                | 94      | 57.5             | NR                  | 63.8    | 44.7     | NR      | 92.6      | 72.3                    |
|                         | PAC + BEVA + GEM | OL       | ITT                 | 17.1                | 93      | 55.2             | NR                  | 72      | 61.3     | NR      | 92.5      | 71                      |
| Buzdar 1997 [28]        | ANA 1            | DB       | ITT                 | 6                   | 128     | Mean 65          | Yes                 | 86      | 64       | 87      | NR        | 40                      |
|                         | MGA              | OL       | ITT                 | 6                   | 128     | Mean 66          | Yes                 | 79      | 57       | 81      | NR        | 47                      |
| Buzdar 2001 [29]        | MGA              | DB       | ITT                 | 18                  | 201     | 65.9             | Yes                 | NR      | NR       | 80      | NR        | 48                      |
|                         | LET 2.5          | DB       | ITT                 | 18                  | 199     | 65.5             | Yes                 | NR      | NR       | 80      | NR        | 48                      |
| Campone 2013 [30]       | CAP + VIN        | OL       | ITT                 | NR                  | 44      | 55               | NR                  | 65.9    | 52.3     | NR      | 75        | 65.9                    |
|                         | DOC + CAP        | OL       | ITT                 | NR                  | 48      | 52.2             | NR                  | 58.3    | 43.8     | NR      | 79.2      | 64.6                    |
| Chan 2009 [31]          | DOC + GEM        | NR       | ITT                 | NR                  | 153     | 56               | NR                  | NR      | NR       | 69      | 49        | 84                      |
|                         | DOC + CAP        | NR       | ITT                 | NR                  | 152     | 53               | NR                  | NR      | NR       | 72      | 46        | 88                      |
| Chia 2008 [32]          | FUL 500/250      | DB       | ITT                 | NR                  | 351     | 63               | Yes                 | NR      | NR       | 98.3    | NR        | 56.1                    |
|                         | EXE              | DB       | ITT                 | NR                  | 342     | 63               | Yes                 | NR      | NR       | 98.2    | NR        | 57.9                    |
| Cristofanilli 2016 [33] | PAL + FUL 500    | DB       | ITT                 | 8.9                 | 347     | 57               | 79.3                | NR      | NR       | 68.6    | 100       | 59.4 (per protocol)     |
|                         | FUL 500          | DB       | ITT                 | 8.9                 | 174     | 56               | 79.3                | NR      | NR       | 63.8    | 100       | 60.3 (per protocol)     |
| Crown 2013 [34]         | CAP + SUN        | OL       | ITT                 | 14.3                | 221     | 52               | NR                  | 66      | 50       | NR      | NR        | NR                      |
|                         | CAP              | OL       | ITT                 | 14.3                | 221     | 54               | NR                  | 68      | 54       | NR      | NR        | NR                      |
| Del Mastro 2013 [35]    | DOC + GEM        | OL       | ITT                 | NR                  | 118     | 57.3             | 70.4                | 70.3    | 61.0     | NR      | 100       | 70.3                    |
|                         | PAC + GEM        | OL       | ITT                 | NR                  | 123     | 56.3             | 68.9                | 75.7    | 69.2     | NR      | 100       | 66                      |
| Di Leo 2010 [36]        | FUL 250          | DB       | ITT                 | NR                  | 374     | 61               | Yes                 | 100     | 71.1     | 100     | NR        | 62                      |
|                         | FUL 500          | DB       | ITT                 | NR                  | 362     | 61               | Yes                 | 100     | 66.6     | 100     | NR        | 66                      |
| Dombernowsky 1998 [37]  | MGA              | DB       | ITT                 | 18-20               | 189     | Mean 64          | Yes                 | NR      | NR       | 58.7    | NR        | 40.7                    |
|                         | LET 2.5          | DB       | ITT                 | 18-20               | 174     | Mean 63.6        | Yes                 | NR      | NR       | 57.5    | NR        | 42.5                    |
| Fountzilas 2004 [38]    | PAC + EPI        | NR       | ITT                 | 23.5                | 163     | 59               | 76                  | 55      | 44       | NR      | 64        | 68                      |
|                         | PAC + CARBO      | NR       | ITT                 | 23.5                | 164     | 59               | 74                  | 62      | 49       | NR      | 64        | 75                      |
| Fountzilas 2009 [19]    | PAC + CARBO      | NR       | ITT                 | 34                  | 136     | 60               | 82                  | 65      | NR       | NR      | 57        | 71                      |
|                         | DOC + GEM        | NR       | ITT                 | 34                  | 144     | 60               | 76                  | 67      | NR       | NR      | 56        | 71                      |
|                         | PAC              | NR       | ITT                 | 34                  | 136     | 60.5             | 79                  | 71      | NR       | NR      | 60        | 76.5                    |

|                                |                    |    |              |      |     |           |      |      |      |      |      |                         |
|--------------------------------|--------------------|----|--------------|------|-----|-----------|------|------|------|------|------|-------------------------|
| <b>Gershanovich 1998 [39]</b>  | AGH + CS           | OL | mITT         | 20   | 178 | 65        | Yes  | NR   | NR   | 50.5 | NR   | 39.9                    |
|                                | LET 2.5            | OL | mITT         | 20   | 185 | 66        | Yes  | NR   | NR   | 60.5 | NR   | 48.6                    |
| <b>Ghosn 2011 [20]</b>         | CAP + VIN          | OL | ITT          | NR   | 41  | 51        | NR   | 78   | 65.9 | NR   | 100  | NR                      |
|                                | DOC                | OL | ITT          | NR   | 29  | 57        | NR   | 72.4 | 62.1 | NR   | 100  | NR                      |
| <b>Hatschek 2012 [40]</b>      | PAC + EPI          | OL | ITT          | NR   | 143 | 57        | NR   | 72   | 56   | NR   | 92   | NR                      |
|                                | PAC + EPI + CAP    | OL | ITT          | NR   | 144 | 55.7      | NR   | 82   | 61   | NR   | 95   | NR                      |
| <b>Heidemann 2002 [21]</b>     | MITOX              | NR | Efficacy     | 13.6 | 119 | NR        | NR   | 43   | 35   | 48   | NR   | NR                      |
|                                | FEC                | NR | Efficacy     | 13.6 | 119 | NR        | NR   | 58   | 48   | 60   | NR   | NR                      |
| <b>Howell 2002 [41]</b>        | FUL 250            | OL | ITT          | 14.4 | 222 | Mean 63   | Yes  | 70.3 | 38.7 | 73.4 | NR   | NR (13.5 visceral only) |
|                                | ANA 1              | OL | ITT          | 14.4 | 229 | Mean 64   | Yes  | 75.5 | 41.5 | 79.9 | NR   | NR (17.9 visceral only) |
| <b>Jiang 2014 [42]</b>         | FUL 250            | DB | NR           | NR   | 110 | Mean 53.6 | Yes  | 100  | NR   | 100  | NR   | NR                      |
|                                | FUL 500            | DB | NR           | NR   | 111 | Mean 53.1 | Yes  | 100  | NR   | 100  | NR   | NR                      |
| <b>Jonat 1996 [43]</b>         | MGA                | OL | ITT          | 6    | 125 | Mean 64   | Yes  | 58   | 41   | NR   | NR   | 42                      |
|                                | ANA 1              | DB | ITT          | 6    | 135 | Mean 65   | Yes  | 62   | 42   | NR   | NR   | 54                      |
| <b>Jones 2005 [44]</b>         | DOC                | OL | ITT          | 61.2 | 225 | 56        | 88   | 51.1 | 36.4 | 56   | NR   | NR                      |
|                                | PAC                | OL | ITT          | 61.2 | 224 | 54        | 86.6 | 42   | 35.3 | 50   | NR   | NR                      |
| <b>Kaufmann 2000 [22]</b>      | EXE                | DB | ITT          | 11.3 | 366 | 65        | 100  | NR   | NR   | 67.2 | NR   | 56.6                    |
|                                | MGA                | DB | ITT          | 11.3 | 403 | 65        | 100  | NR   | NR   | 68   | NR   | 59.3                    |
| <b>Luck 2013 [45]</b>          | PAC + CAP          | NR | ITT          | 24.9 | 170 | 57        | NR   | NR   | NR   | 70   | NR   | 56                      |
|                                | PAC + EPI          | NR | ITT          | 24.9 | 170 | 58        | NR   | NR   | NR   | 68   | NR   | 47                      |
| <b>Martin 2011 [46]</b>        | PAC + MOT          | DB | ITT          | NR   | 91  | 55        | 76   | NR   | NR   | 80   | 100  | NR                      |
|                                | PAC                | DB | ITT          | NR   | 94  | 53        | 66   | NR   | NR   | 80   | 100  | NR                      |
|                                | PAC + BEVA         | OL | ITT          | NR   | 97  | 55        | 64   | NR   | NR   | 80   | 100  | NR                      |
| <b>Martin 2015 [47]</b>        | CAP (Intermittent) | NR | ITT          | NR   | 95  | 61        | 65.3 | NR   | NR   | 79   | 100  | 78.1                    |
|                                | CAP (Continuous)   | NR | ITT          | NR   | 97  | 59        | 61.9 | NR   | NR   | 78.4 | 100  | NR                      |
| <b>Miller 2007 [23]</b>        | PAC + BEVA         | OL | ITT          | 41.6 | 347 | 56        | NR   | 59.9 | 44.7 | NR   | 92.5 | 79.5                    |
|                                | PAC                | OL | ITT          | 43.5 | 326 | 55        | NR   | 62.9 | 45.1 | NR   | 89.9 | 87.1                    |
| <b>Ohno 2010 [48]</b>          | FUL 250            | DB | ITT          | NR   | 45  | 61        | Yes  | 100  | 71.7 | 100  | 80   | 57.8                    |
|                                | FUL 500/250        | DB | ITT          | NR   | 51  | 62        | Yes  | 100  | 70.6 | 100  | 90.8 | 54.9                    |
|                                | FUL 500            | DB | ITT          | NR   | 47  | 61        | Yes  | 100  | 63.8 | 100  | 85.1 | 57.4                    |
| <b>Osborne 2002 [49]</b>       | FUL 250            | DB | ITT          | 16.8 | 206 | Mean 63   | Yes  | 82.5 | 62.1 | 86.9 | NR   | NR (18.9 visceral only) |
|                                | ANA 1              | DB | ITT          | 16.8 | 194 | Mean 62   | Yes  | 80.4 | 54.6 | 87.1 | NR   | NR (23.2 visceral only) |
| <b>Papadimitriou 2009 [50]</b> | DOC                | NR | Per-protocol | NR   | 34  | 57        | NR   | NR   | NR   | 74   | 29   | NR                      |
|                                | DOC + GEM          | NR | Per-protocol | NR   | 41  | 57        | NR   | NR   | NR   | 66   | 34   | NR                      |
| <b>Pritchard 2010 [51]</b>     | FUL 250            | DB | ITT          | NR   | 47  | 63        | Yes  | 100  | 63.8 | 100  | 78.7 | 72.3                    |

|                                                                |                    |    |      |      |     |           |      |                  |      |     |      |      |
|----------------------------------------------------------------|--------------------|----|------|------|-----|-----------|------|------------------|------|-----|------|------|
|                                                                | FUL 500/250        | DB | ITT  | NR   | 51  | 69        | Yes  | 100              | 62.7 | 100 | 72.5 | 80.4 |
|                                                                | FUL 500            | DB | ITT  | NR   | 46  | 67        | Yes  | 100              | 69.6 | 100 | 69.6 | 80.4 |
| <b>Rugo 2013 [52]</b>                                          | IXA 16 + BEVA      | OL | ITT  | >19  | 46  | 60        | NR   | 80.4             | NR   | NR  | 97.8 | NR   |
|                                                                | IXA 40 + BEVA      | OL | ITT  | >19  | 45  | 59        | NR   | 77.8             | NR   | NR  | 100  | NR   |
|                                                                | PAC + BEVA         | OL | ITT  | >19  | 32  | 59        | NR   | 84.4             | NR   | NR  | 100  | NR   |
| <b>Rugo 2015 [53]</b>                                          | PAC + BEVA         | NR | mITT | 25   | 283 | NR        | NR   | NR               | NR   | 71  | 92   | 77   |
|                                                                | NAB-PAC + BEVA     | NR | mITT | 25   | 271 | NR        | NR   | NR               | NR   | 73  | 93   | 76   |
|                                                                | IXA 16 + BEVA      | NR | mITT | 25   | 245 | NR        | NR   | NR               | NR   | 72  | 93   | 81   |
| <b>Smorenburg 2014 [54]</b>                                    | Peg. LIP DOX       | NR | ITT  | 39   | 40  | NR        | NR   | 62               | NR   | NR  | 62   | 30   |
|                                                                | CAP (Intermittent) | NR | ITT  | 39   | 38  | NR        | NR   | 58               | NR   | NR  | 61   | 32   |
| <b>Stockler 2011 [55]</b>                                      | CMF                | NR | ITT  | 39.6 | 109 | 62        | NR   | NR               | NR   | 64  | NR   | NR   |
|                                                                | CAP (Intermittent) | NR | ITT  | 39.6 | 108 |           | NR   | NR               | NR   | 62  | NR   | NR   |
|                                                                | CAP (Continuous)   | NR | ITT  | 39.6 | 108 |           | NR   | NR               | NR   | 67  | NR   | NR   |
| <b>Wang 2015 [56]</b>                                          | DOC + CAP          | OL | ITT  | 36   | 104 | 52        | 65.7 | 61.5             | 60.6 | NR  | 66.3 | 69.9 |
|                                                                | CAP + VIN          | OL | ITT  | 36   | 102 | 52        | 62.6 | 59.8             | 60.8 | NR  | 67.6 | 65.7 |
| <b>Xu 2011 [57]</b>                                            | FUL 250            | DB | ITT  | NR   | 121 | Mean 53.4 | Yes  | 100              | NR   | NR  | NR   | NR   |
|                                                                | ANA 1              | DB | ITT  | NR   | 113 | Mean 54.8 | Yes  | 100              | NR   | NR  | NR   | NR   |
| <b>Yardley 2013 [58]</b>                                       | EVE + EXE          | DB | ITT  | 17.7 | 485 | 62        | 100  | 100              | NR   | 100 | 100  | 58   |
|                                                                | EXE                | DB | ITT  | 17.7 | 239 | 61        | 100  | 100              | NR   | 100 | 100  | 59   |
| <b>Forced First-line Connections</b>                           |                    |    |      |      |     |           |      |                  |      |     |      |      |
| <b>Ackland 2001* [24]</b>                                      | FEC                | NR | ITT  | 21   | 223 | 56        | 75   | 17               | NR   | NR  | NR   | 57   |
|                                                                | CMF                | NR | ITT  | 19   | 237 | 55        | 69   | 14               | NR   | NR  | NR   | 60   |
| <b>Bonneterre 2004 [1]</b>                                     | DOC + EPI          | OL | ITT  | 23.8 | 70  | 54        | NR   | 54               | 51   | NR  | NR   | NR   |
|                                                                | FEC                | OL | ITT  | 23.8 | 72  | 54        | NR   | 67               | 60   | NR  | NR   | NR   |
| <b>Forced Key Connections Based on Patient Characteristics</b> |                    |    |      |      |     |           |      |                  |      |     |      |      |
| <b>Dixon 1992 [18]</b>                                         | MGA                | NR | ITT  | NR   | 30  | 64        | 100  | 27               | NR   | NR  | NR   | 30   |
|                                                                | MITOX              | NR | ITT  | NR   | 30  | 61        | 100  | 20               | NR   | NR  | NR   | 30   |
| <b>Paridaens 2000 [59]</b>                                     | PAC                | NR | ITT  | NR   | 166 | 54        | NR   | 27 (34% unknown) | NR   | NR  | NR   | 78   |
|                                                                | DOX                | NR | ITT  | NR   | 165 | 55        | NR   | 24 (37% unknown) | NR   | NR  | NR   | 75   |

AGH = aminoglutethimide; ANA 1 = anastrozole 1 mg; BEVA = bevacizumab; CAP = capecitabine; CARBO = carboplatin; CMF = cyclophosphamide + methotrexate + 5-fluorouracil; CS = corticosteroid; DB = double blind; DOC = docetaxel; DOX = doxorubicin; EPI = epirubicin; ER+ = estrogen receptor-positive; EVE = everolimus; EXE = exemestane; FEC = fluorouracil + epirubicin + cyclophosphamide; FUL 500/250 = fulvestrant 500 mg/250 mg; FUP = follow-up; GEM = gemcitabine; HER2- = human epidermal growth factor receptor type 2-negative; HR+ = hormone receptor-positive; ITT = intention-to-treat; IXA = ixabepilone; LET 2.5 = letrozole 2.5 mg; MGA = megestrol acetate; MITOX = mitoxantrone; mITT = modified intention-to-treat; MOT = motesanib; NAB-PAC = nanoparticle albumin-bound paclitaxel; NR = not reported; OL = open label; PAC = paclitaxel; PAL = palbociclib; Peg. LIP DOX = pegylated liposomal doxorubicin; SOR = sorafenib; SUN = sunitinib; VIN = vinorelbine.

\*Also a forced key connection based on patient characteristics.

## Appendix D: Risk of Bias Assessment

Quality assessment for all studies was conducted using the checklist provided in the National Institute for Health and Care Excellence (NICE) single technology appraisal template [60].

**Table 4:** Risk of Bias Assessment for First-line Studies

| Study                     | Randomization | Concealment of treatment allocation | Blinding of care providers, participants, and outcome assessors | Groups similar at study outset | Unexpected imbalances in drop-out rates between groups | Selective reporting | ITT analysis included |
|---------------------------|---------------|-------------------------------------|-----------------------------------------------------------------|--------------------------------|--------------------------------------------------------|---------------------|-----------------------|
| Bonneterre 2004           | +             | -                                   | -                                                               | +                              | +                                                      | +                   | +                     |
| Cinieri 2014              | +             | -                                   | -                                                               | +                              | +                                                      | +                   | +                     |
| Finn 2015*                | +             | -                                   | -                                                               | +                              | -                                                      | +                   | +                     |
| Finn 2016                 | ?             | +                                   | ?                                                               | +                              | +                                                      | +                   | +                     |
| Miles 2010                | +             | +                                   | ?                                                               | +                              | +                                                      | +                   | +                     |
| Mouridsen 2001            | +             | +                                   | +                                                               | +                              | +                                                      | +                   | +                     |
| Nabholtz 2000             | +             | +                                   | ?                                                               | +                              | +                                                      | +                   | +                     |
| O'Shaughnessy 2001        | +             | -                                   | -                                                               | +                              | +                                                      | +                   | +                     |
| Paridaens 2008            | +             | -                                   | -                                                               | +                              | +                                                      | +                   | +                     |
| Robert 2011a              | +             | -                                   | -                                                               | +                              | +                                                      | +                   | +                     |
| Robert 2011b              | +             | +                                   | +                                                               | +                              | +                                                      | +                   | +                     |
| Robertson 2012*           | +             | -                                   | -                                                               | +                              | +                                                      | +                   | +                     |
| Vici 2011                 | +             | ?                                   | ?                                                               | +                              | +                                                      | +                   | +                     |
| Welt 2016                 | +             | -                                   | -                                                               | +                              | +                                                      | +                   | +                     |
| Yardley 2009              | ?             | ?                                   | ?                                                               | +                              | +                                                      | +                   | +                     |
| Yardley 2015              | ?             | ?                                   | ?                                                               | +                              | +                                                      | +                   | +                     |
| <b>Forced connections</b> |               |                                     |                                                                 |                                |                                                        |                     |                       |
| Ackland 2001              | +             | ?                                   | ?                                                               | +                              | +                                                      | +                   | +                     |
| Bachelot 2011             | ?             | ?                                   | ?                                                               | -                              | +                                                      | +                   | +                     |
| Dixon 1992                | ?             | ?                                   | ?                                                               | +                              | +                                                      | +                   | +                     |
| Fountzilas 2009           | +             | ?                                   | ?                                                               | -                              | +                                                      | -                   | +                     |
| Ghosn 2011                | ?             | -                                   | -                                                               | +                              | +                                                      | +                   | +                     |
| Heidemann 2002            | +             | ?                                   | ?                                                               | +                              | +                                                      | +                   | +                     |
| Kaufmann 2000             | +             | +                                   | ?                                                               | +                              | +                                                      | +                   | +                     |
| Miller 2007               | +             | -                                   | -                                                               | +                              | +                                                      | +                   | +                     |

\*Included in sensitivity analyses only.

⊕ = low risk of bias; ⊖ = high risk of bias; ? = unclear risk of bias; ITT = intention to treat.

**Table 5:** Risk of Bias Assessment for Second-line Studies

| Study                     | Randomization | Concealment of treatment allocation | Blinding of care providers, participants, and outcome assessors | Groups similar at study outset | Unexpected imbalances in drop-out rates between groups | Selective reporting | ITT analysis included |
|---------------------------|---------------|-------------------------------------|-----------------------------------------------------------------|--------------------------------|--------------------------------------------------------|---------------------|-----------------------|
| Bachelot 2011             | ?             | ?                                   | ?                                                               | -                              | +                                                      | +                   | +                     |
| Baselga 2012              | +             | +                                   | ?                                                               | +                              | +                                                      | +                   | +                     |
| Bergh 2012                | +             | -                                   | -                                                               | +                              | +                                                      | +                   | +                     |
| Brufsky 2011              | +             | -                                   | -                                                               | +                              | +                                                      | +                   | +                     |
| Buzdar 1997               | +             | +                                   | ?                                                               | +                              | +                                                      | +                   | +                     |
| Buzdar 2001               | -             | +                                   | +                                                               | +                              | +                                                      | +                   | +                     |
| Campone 2013              | +             | -                                   | -                                                               | +                              | +                                                      | +                   | +                     |
| Chan 2009                 | +             | ?                                   | ?                                                               | +                              | +                                                      | +                   | +                     |
| Chia 2008                 | +             | +                                   | ?                                                               | +                              | +                                                      | +                   | +                     |
| Cristofanilli 2016        | +             | +                                   | +                                                               | +                              | +                                                      | +                   | +                     |
| Crown 2013                | +             | -                                   | -                                                               | +                              | -                                                      | +                   | +                     |
| Del Mastro 2013           | +             | -                                   | -                                                               | +                              | +                                                      | +                   | +                     |
| Di Leo 2010               | +             | +                                   | ?                                                               | +                              | +                                                      | +                   | +                     |
| Dombernowsky 1998         | +             | +                                   | +                                                               | +                              | +                                                      | +                   | +                     |
| Fountzilas 2004           | +             | ?                                   | ?                                                               | +                              | +                                                      | +                   | +                     |
| Fountzilas 2009           | +             | ?                                   | ?                                                               | -                              | +                                                      | -                   | +                     |
| Gershanovich 1998         | ?             | -                                   | -                                                               | +                              | +                                                      | +                   | +                     |
| Ghosn 2011                | ?             | -                                   | -                                                               | +                              | +                                                      | +                   | +                     |
| Hatschek 2012             | +             | -                                   | -                                                               | +                              | +                                                      | +                   | +                     |
| Heidemann 2002            | +             | ?                                   | ?                                                               | +                              | +                                                      | +                   | +                     |
| Howell 2002               | ?             | -                                   | -                                                               | +                              | +                                                      | +                   | +                     |
| Jiang 2014                | +             | +                                   | ?                                                               | +                              | +                                                      | +                   | ?                     |
| Jonat 1996                | +             | ?                                   | ?                                                               | +                              | +                                                      | +                   | +                     |
| Jones 2005                | +             | -                                   | -                                                               | +                              | +                                                      | +                   | +                     |
| Kaufmann 2000             | +             | +                                   | ?                                                               | +                              | +                                                      | +                   | +                     |
| Luck 2013                 | +             | -                                   | -                                                               | +                              | +                                                      | +                   | +                     |
| Martin 2011               | +             | +                                   | +                                                               | +                              | +                                                      | -                   | +                     |
| Martin 2015               | ?             | ?                                   | ?                                                               | +                              | +                                                      | +                   | +                     |
| Miller 2007               | +             | -                                   | -                                                               | +                              | +                                                      | +                   | +                     |
| Ohno 2010                 | ?             | +                                   | ?                                                               | +                              | +                                                      | +                   | +                     |
| Osborne 2002              | ?             | +                                   | ?                                                               | +                              | +                                                      | +                   | +                     |
| Papadimitriou 2009        | ?             | ?                                   | ?                                                               | +                              | +                                                      | +                   | -                     |
| Pritchard 2010            | ?             | +                                   | ?                                                               | +                              | +                                                      | +                   | +                     |
| Rugo 2013                 | +             | -                                   | -                                                               | +                              | +                                                      | -                   | +                     |
| Rugo 2015                 | +             | ?                                   | ?                                                               | +                              | +                                                      | +                   | +                     |
| Smorenburg 2014           | +             | ?                                   | ?                                                               | +                              | +                                                      | +                   | +                     |
| Stockler 2011             | +             | ?                                   | ?                                                               | +                              | +                                                      | +                   | +                     |
| Wang 2015                 | +             | -                                   | -                                                               | +                              | +                                                      | +                   | +                     |
| Xu 2011                   | ?             | +                                   | ?                                                               | +                              | +                                                      | +                   | +                     |
| Yardley 2013              | +             | +                                   | ?                                                               | +                              | -                                                      | +                   | +                     |
| <b>Forced connections</b> |               |                                     |                                                                 |                                |                                                        |                     |                       |
| Ackland 2001              | +             | ?                                   | ?                                                               | +                              | +                                                      | +                   | +                     |
| Bonnerterre 2004          | +             | -                                   | -                                                               | +                              | +                                                      | +                   | +                     |



| Study          | Randomization | Concealment of treatment allocation | Blinding of care providers, participants, and outcome assessors | Groups similar at study outset | Unexpected imbalances in drop-out rates between groups | Selective reporting | ITT analysis included |
|----------------|---------------|-------------------------------------|-----------------------------------------------------------------|--------------------------------|--------------------------------------------------------|---------------------|-----------------------|
| Dixon 1992     | ?             | ?                                   | ?                                                               | +                              | +                                                      | +                   | +                     |
| Paridaens 2000 | +             | ?                                   | ?                                                               | +                              | +                                                      | +                   | +                     |

 = low risk of bias; 
  = high risk of bias; 
  = unclear risk of bias; 
 ITT = intention to treat.

## Appendix E: Sensitivity Analyses

Two key sensitivity analyses were conducted:

- 1) Fixed- and random-effects models of first-line PFS/TTP analysis using both PALOMA-1 and PALOMA-2
- 2) Fixed- and random-effects models excluding studies with the largest differences in median PFS/TTP for primary analyses.

Findings from these sensitivity analyses compared with the main analyses for first- and second-line PFS/TTP are summarized in **Table 6** and **Table 7**, respectively. Findings are sorted by highest SUCRA, based on the primary NMA, and by single agent versus combination therapies. Endocrine therapies are included in all analyses.

**Table 6:** Summary of Findings from Main Analyses and Sensitivity Analyses for First-line PFS/TTP: Palbociclib + Letrozole vs Comparators

| Comparisons                                                    | Fixed-Effects Model        | Random-Effects Model Using Vague Priors | Random-Effects Model Using Informative Priors | SA #1: PALOMA-1 and PALOMA-2 (FE) | SA #2: Largest Differences in Median Values Removed (FE) |
|----------------------------------------------------------------|----------------------------|-----------------------------------------|-----------------------------------------------|-----------------------------------|----------------------------------------------------------|
| Palbociclib + Letrozole                                        | 1                          | 1                                       | 1                                             | 1                                 | 1                                                        |
| <b>Single Chemotherapy Agents and Endocrine Therapies</b>      |                            |                                         |                                               |                                   |                                                          |
| Anastrozole                                                    | <b>0.58 (0.41 to 0.83)</b> | 0.55 (0.06 to 4.87)                     | 0.57 (0.07 to 4.65)                           | <b>0.57 (0.41 to 0.79)</b>        | <b>0.58 (0.41 to 0.83)</b>                               |
| Letrozole                                                      | <b>0.58 (0.46 to 0.72)</b> | 0.58 (0.05 to 6.34)                     | 0.55 (0.08 to 3.95)                           | <b>0.56 (0.46 to 0.68)</b>        | <b>0.58 (0.46 to 0.72)</b>                               |
| Paclitaxel                                                     | 0.59 (0.19 to 1.96)        | 0.59 (0.07 to 4.83)                     | 0.63 (0.07 to 5.48)                           | 0.57 (0.19 to 1.77)               | 0.59 (0.19 to 1.96)                                      |
| Docetaxel                                                      | 0.51 (0.14 to 2.03)        | 0.5 (0.06 to 3.92)                      | 0.55 (0.07 to 4.24)                           | 0.49 (0.16 to 1.55)               | 0.51 (0.14 to 2.03)                                      |
| Exemestane                                                     | <b>0.47 (0.34 to 0.68)</b> | 0.46 (0.05 to 3.96)                     | 0.47 (0.07 to 3.38)                           | <b>0.46 (0.33 to 0.65)</b>        | <b>0.47 (0.34 to 0.68)</b>                               |
| Tamoxifen                                                      | <b>0.4 (0.31 to 0.53)</b>  | 0.37 (0.04 to 3.15)                     | 0.39 (0.05 to 3.17)                           | <b>0.39 (0.3 to 0.5)</b>          | <b>0.4 (0.31 to 0.53)</b>                                |
| Fulvestrant 500 mg                                             | NA                         | NA                                      | NA                                            | NA                                | NA                                                       |
| Megestrol Acetate                                              | <b>0.38 (0.26 to 0.56)</b> | 0.39 (0.05 to 3.13)                     | 0.38 (0.04 to 3.76)                           | <b>0.37 (0.26 to 0.54)</b>        | <b>0.38 (0.26 to 0.56)</b>                               |
| Capecitabine (Intermittent)                                    | <b>0.28 (0.11 to 0.72)</b> | 0.27 (0.03 to 2.12)                     | 0.29 (0.03 to 2.45)                           | <b>0.28 (0.11 to 0.64)</b>        | <b>0.28 (0.11 to 0.72)</b>                               |
| Mitoxantrone                                                   | <b>0.28 (0.13 to 0.61)</b> | 0.27 (0.03 to 2.23)                     | 0.28 (0.03 to 2.28)                           | <b>0.28 (0.13 to 0.54)</b>        | <b>0.28 (0.13 to 0.61)</b>                               |
| <b>Combination Chemotherapy Agents and Endocrine Therapies</b> |                            |                                         |                                               |                                   |                                                          |
| Paclitaxel + Bevacizumab + Everolimus                          | 0.99 (0.29 to 3.81)        | 0.98 (0.12 to 8.43)                     | 0.93 (0.12 to 7.17)                           | 0.98 (0.29 to 3.44)               | 0.99 (0.29 to 3.81)                                      |
| Paclitaxel + Bevacizumab                                       | 0.98 (0.31 to 3.38)        | 0.96 (0.13 to 7.29)                     | 0.94 (0.1 to 8.65)                            | 0.95 (0.31 to 3.06)               | 0.98 (0.31 to 3.38)                                      |
| Docetaxel + Bevacizumab 15 mg                                  | 0.65 (0.18 to 2.69)        | 0.65 (0.09 to 4.7)                      | 0.72 (0.09 to 6.11)                           | 0.65 (0.18 to 2.35)               | 0.65 (0.18 to 2.69)                                      |
| Docetaxel + Bevacizumab 7.5 mg                                 | 0.59 (0.16 to 2.4)         | 0.58 (0.08 to 4.19)                     | 0.64 (0.08 to 5.36)                           | 0.58 (0.16 to 2.11)               | 0.59 (0.16 to 2.4)                                       |
| Paclitaxel + Sunitinib                                         | 0.6 (0.18 to 2.14)         | 0.6 (0.07 to 4.93)                      | 0.66 (0.09 to 5)                              | 0.58 (0.18 to 1.97)               | 0.6 (0.18 to 2.14)                                       |
| Docetaxel + Gemcitabine                                        | 0.59 (0.2 to 1.91)         | 0.59 (0.08 to 4.32)                     | 0.64 (0.08 to 5.2)                            | 0.58 (0.2 to 1.73)                | 0.59 (0.2 to 1.91)                                       |
| Liposomal Doxorubicin                                          | 0.54 (0.14 to 2.29)        | 0.53 (0.07 to 3.79)                     | 0.59 (0.07 to 4.99)                           | 0.53 (0.14 to 2.05)               | 0.54 (0.14 to 2.29)                                      |
| Paclitaxel + Gemcitabine                                       | 0.51 (0.15 to 1.87)        | 0.49 (0.06 to 4.21)                     | 0.56 (0.08 to 4.06)                           | 0.5 (0.15 to 1.69)                | 0.51 (0.15 to 1.87)                                      |
| Paclitaxel + Carboplatin                                       | 0.53 (0.17 to 1.83)        | 0.51 (0.06 to 4.35)                     | 0.57 (0.06 to 5.16)                           | 0.52 (0.17 to 1.68)               | 0.53 (0.17 to 1.83)                                      |
| Docetaxel + Capecitabine                                       | 0.51 (0.19 to 1.49)        | 0.5 (0.06 to 4.19)                      | 0.54 (0.08 to 3.9)                            | 0.48 (0.19 to 1.15)               | 0.51 (0.19 to 1.49)                                      |
| Capecitabine + Vinorelbine                                     | 0.5 (0.16 to 1.72)         | 0.49 (0.06 to 4.18)                     | 0.55 (0.06 to 4.98)                           | 0.5 (0.19 to 1.35)                | 0.5 (0.16 to 1.72)                                       |

|                                                  |                                                   |                                                                                                   |                                                                                                  |                                                   |                                                   |
|--------------------------------------------------|---------------------------------------------------|---------------------------------------------------------------------------------------------------|--------------------------------------------------------------------------------------------------|---------------------------------------------------|---------------------------------------------------|
| Capecitabine + Bevacizumab + Vinorelbine         | 0.48 (0.19 to 1.27)                               | 0.46 (0.06 to 3.76)                                                                               | 0.5 (0.06 to 4.02)                                                                               | 0.5 (0.14 to 1.79)                                | 0.48 (0.19 to 1.27)                               |
| Docetaxel + Epirubicin                           | 0.47 (0.2 to 1.19)                                | 0.46 (0.06 to 3.32)                                                                               | 0.49 (0.06 to 4.15)                                                                              | 0.48 (0.2 to 1.06)                                | 0.47 (0.2 to 1.19)                                |
| Capecitabine + Bevacizumab                       | 0.4 (0.16 to 1.06)                                | 0.39 (0.05 to 2.82)                                                                               | 0.41 (0.06 to 2.99)                                                                              | <b>0.4 (0.16 to 0.96)</b>                         | 0.4 (0.16 to 1.06)                                |
| Fluorouracil + Epirubicin + Cyclophosphamide     | <b>0.33 (0.15 to 0.77)</b>                        | 0.32 (0.04 to 2.47)                                                                               | 0.34 (0.03 to 3.34)                                                                              | <b>0.34 (0.15 to 0.68)</b>                        | <b>0.33 (0.15 to 0.77)</b>                        |
| Cyclophosphamide + Methotrexate + 5-Fluorouracil | <b>0.24 (0.11 to 0.57)</b>                        | 0.24 (0.03 to 2.11)                                                                               | 0.25 (0.03 to 1.85)                                                                              | <b>0.25 (0.11 to 0.5)</b>                         | <b>0.24 (0.11 to 0.57)</b>                        |
| <b>Model Fit Statistics</b>                      | Residual Deviance =<br>25.08 vs 25<br>DIC = -0.02 | Residual Deviance =<br>25.71 vs 25<br>DIC = 0.11<br>Heterogeneity (SD) =<br>0.67 (0.010 to 4.526) | Residual Deviance =<br>25.69 vs 25<br>DIC = -0.05<br>Heterogeneity (SD) =<br>0.73 (0.02 to 3.64) | Residual Deviance =<br>25.08 vs 26<br>DIC = -0.02 | Residual Deviance =<br>25.08 vs 25<br>DIC = -0.02 |

Primary NMA uses data from PALOMA-2 [4]. Values shown are hazard ratios with 95% CrI. Statistically significant differences are shown in bold.

CrI = credible interval; DIC = deviance information criterion; FE = fixed-effects; NA = not applicable; SA = sensitivity analysis; SD = standard deviation.

**Table 7:** Summary of Findings from Main Analyses and Sensitivity Analyses for Second-line PFS/TTP: Palbociclib + Fulvestrant vs Comparators

| Comparisons                                                    | Fixed-effects Model        | Random-Effects Model Using Vague Priors | Random-Effects Model Using Informative Priors | SA #1: PALOMA-1 and PALOMA-2 (FE) | SA #2: Largest Differences in Median Values Removed (FE) |
|----------------------------------------------------------------|----------------------------|-----------------------------------------|-----------------------------------------------|-----------------------------------|----------------------------------------------------------|
| Palbociclib + Fulvestrant                                      | 1                          | 1                                       | 1                                             | NA                                | 1                                                        |
| <b>Single Chemotherapy Agents and Endocrine Therapies</b>      |                            |                                         |                                               |                                   |                                                          |
| Doxorubicin                                                    | 0.8 (0.27 to 2.44)         | 0.81 (0.22 to 3.02)                     | 0.82 (0.19 to 3.4)                            | NA                                | 0.92 (0.28 to 3.01)                                      |
| Docetaxel                                                      | 0.71 (0.24 to 2.13)        | 0.69 (0.2 to 2.57)                      | 0.7 (0.17 to 2.76)                            | NA                                | 0.83 (0.25 to 2.71)                                      |
| Paclitaxel                                                     | 0.48 (0.16 to 1.44)        | 0.49 (0.14 to 1.74)                     | 0.49 (0.12 to 1.98)                           | NA                                | 0.55 (0.17 to 1.77)                                      |
| Fulvestrant 500 mg                                             | <b>0.46 (0.36 to 0.59)</b> | <b>0.46 (0.32 to 0.65)</b>              | <b>0.46 (0.32 to 0.67)</b>                    | NA                                | <b>0.46 (0.36 to 0.59)</b>                               |
| Fulvestrant 500/250 mg                                         | <b>0.44 (0.31 to 0.65)</b> | <b>0.45 (0.27 to 0.75)</b>              | <b>0.45 (0.28 to 0.77)</b>                    | NA                                | <b>0.46 (0.3 to 0.7)</b>                                 |
| Exemestane                                                     | <b>0.43 (0.3 to 0.62)</b>  | <b>0.44 (0.26 to 0.75)</b>              | <b>0.44 (0.26 to 0.77)</b>                    | NA                                | <b>0.45 (0.3 to 0.67)</b>                                |
| Letrozole                                                      | <b>0.38 (0.26 to 0.56)</b> | <b>0.39 (0.23 to 0.7)</b>               | <b>0.39 (0.23 to 0.72)</b>                    | NA                                | <b>0.37 (0.23 to 0.58)</b>                               |
| Anastrozole                                                    | <b>0.37 (0.27 to 0.51)</b> | <b>0.38 (0.25 to 0.61)</b>              | <b>0.38 (0.24 to 0.62)</b>                    | NA                                | <b>0.39 (0.28 to 0.55)</b>                               |
| Fulvestrant 250 mg                                             | <b>0.37 (0.28 to 0.49)</b> | <b>0.37 (0.25 to 0.57)</b>              | <b>0.38 (0.25 to 0.58)</b>                    | NA                                | <b>0.37 (0.28 to 0.5)</b>                                |
| Megestrol Acetate                                              | <b>0.34 (0.24 to 0.49)</b> | <b>0.35 (0.22 to 0.59)</b>              | <b>0.35 (0.21 to 0.61)</b>                    | NA                                | <b>0.36 (0.24 to 0.54)</b>                               |
| Mitoxantrone                                                   | <b>0.26 (0.12 to 0.53)</b> | <b>0.26 (0.11 to 0.6)</b>               | <b>0.26 (0.11 to 0.65)</b>                    | NA                                | <b>0.27 (0.12 to 0.58)</b>                               |
| Capecitabine (Continuous)                                      | <b>0.24 (0.11 to 0.56)</b> | <b>0.25 (0.09 to 0.7)</b>               | <b>0.25 (0.09 to 0.78)</b>                    | NA                                | <b>0.27 (0.11 to 0.66)</b>                               |
| Pegylated Liposomal Doxorubicin                                | <b>0.19 (0.07 to 0.5)</b>  | <b>0.2 (0.06 to 0.64)</b>               | <b>0.19 (0.06 to 0.67)</b>                    | NA                                | <b>0.19 (0.07 to 0.53)</b>                               |
| <b>Combination Chemotherapy Agents and Endocrine Therapies</b> |                            |                                         |                                               |                                   |                                                          |
| Everolimus + Exemestane                                        | 1.13 (0.74 to 1.73)        | 1.15 (0.63 to 2.17)                     | 1.16 (0.62 to 2.25)                           | NA                                | 1.18 (0.74 to 1.88)                                      |
| Paclitaxel + Bevacizumab + Gemcitabine                         | 0.89 (0.28 to 2.82)        | 0.89 (0.23 to 3.49)                     | 0.91 (0.2 to 3.95)                            | NA                                | 0.86 (0.24 to 3.08)                                      |
| Docetaxel + Sunitinib                                          | 0.77 (0.26 to 2.36)        | 0.75 (0.21 to 2.81)                     | 0.76 (0.18 to 3.12)                           | NA                                | 0.9 (0.27 to 3.01)                                       |
| Paclitaxel + Bevacizumab                                       | 0.72 (0.24 to 2.2)         | 0.73 (0.2 to 2.68)                      | 0.74 (0.17 to 3.11)                           | NA                                | 0.7 (0.2 to 2.41)                                        |
| Paclitaxel + Gemcitabine                                       | 0.64 (0.22 to 1.94)        | 0.67 (0.19 to 2.45)                     | 0.67 (0.16 to 2.77)                           | NA                                | 0.86 (0.24 to 3.08)                                      |
| Ixabepilone 40 mg + Bevacizumab                                | 0.61 (0.18 to 2.05)        | 0.62 (0.15 to 2.53)                     | 0.62 (0.13 to 2.84)                           | NA                                | NA                                                       |
| Nab-Paclitaxel + Bevacizumab                                   | 0.6 (0.2 to 1.87)          | 0.6 (0.16 to 2.27)                      | 0.61 (0.13 to 2.61)                           | NA                                | 0.58 (0.17 to 2.04)                                      |
| Docetaxel + Gemcitabine                                        | 0.55 (0.19 to 1.61)        | 0.57 (0.17 to 1.99)                     | 0.58 (0.15 to 2.29)                           | NA                                | 0.61 (0.19 to 1.93)                                      |

|                                                  |                                                   |                                                                                                  |                                                                                                  |    |                                                   |
|--------------------------------------------------|---------------------------------------------------|--------------------------------------------------------------------------------------------------|--------------------------------------------------------------------------------------------------|----|---------------------------------------------------|
| Paclitaxel + Motesanib                           | 0.51 (0.16 to 1.61)                               | 0.53 (0.14 to 2.13)                                                                              | 0.53 (0.12 to 2.33)                                                                              | NA | 0.58 (0.17 to 1.98)                               |
| Docetaxel + Capecitabine                         | 0.49 (0.17 to 1.38)                               | 0.51 (0.16 to 1.7)                                                                               | 0.51 (0.14 to 1.96)                                                                              | NA | 0.51 (0.17 to 1.58)                               |
| Docetaxel + Epirubicin                           | 0.45 (0.19 to 1.06)                               | 0.46 (0.17 to 1.28)                                                                              | 0.47 (0.16 to 1.44)                                                                              | NA | 0.47 (0.19 to 1.17)                               |
| Paclitaxel + Carboplatin                         | 0.44 (0.14 to 1.38)                               | 0.46 (0.13 to 1.67)                                                                              | 0.46 (0.11 to 1.94)                                                                              | NA | 0.5 (0.15 to 1.67)                                |
| Ixabepilone 16 mg + Bevacizumab                  | 0.45 (0.15 to 1.39)                               | 0.45 (0.12 to 1.71)                                                                              | 0.46 (0.1 to 1.93)                                                                               | NA | NA                                                |
| Capecitabine + Sorafenib                         | 0.44 (0.17 to 1.14)                               | 0.45 (0.14 to 1.49)                                                                              | 0.44 (0.14 to 1.54)                                                                              | NA | 0.43 (0.16 to 1.18)                               |
| Capecitabine + Vinorelbine                       | 0.44 (0.15 to 1.28)                               | 0.47 (0.14 to 1.62)                                                                              | 0.47 (0.13 to 1.85)                                                                              | NA | 0.72 (0.22 to 2.37)                               |
| Paclitaxel + Epirubicin                          | 0.35 (0.11 to 1.16)                               | 0.36 (0.09 to 1.44)                                                                              | 0.31 (0.07 to 1.37)                                                                              | NA | 0.4 (0.11 to 1.4)                                 |
| Fluorouracil + Epirubicin + Cyclophosphamide     | <b>0.31 (0.14 to 0.67)</b>                        | <b>0.32 (0.13 to 0.78)</b>                                                                       | <b>0.31 (0.12 to 0.87)</b>                                                                       | NA | <b>0.32 (0.14 to 0.73)</b>                        |
| Capecitabine (Intermittent)                      | <b>0.28 (0.13 to 0.65)</b>                        | <b>0.29 (0.1 to 0.81)</b>                                                                        | <b>0.29 (0.1 to 0.89)</b>                                                                        | NA | <b>0.28 (0.11 to 0.68)</b>                        |
| Paclitaxel + Capecitabine                        | <b>0.3 (0.09 to 0.98)</b>                         | 0.31 (0.08 to 1.23)                                                                              | 0.31 (0.07 to 1.44)                                                                              | NA | 0.34 (0.09 to 1.2)                                |
| Paclitaxel + Epirubicin + Capecitabine           | <b>0.29 (0.09 to 0.95)</b>                        | 0.31 (0.08 to 1.16)                                                                              | 0.37 (0.08 to 1.7)                                                                               | NA | 0.33 (0.1 to 1.15)                                |
| Aminoglutethimide + Corticosteroid               | <b>0.27 (0.17 to 0.43)</b>                        | <b>0.28 (0.15 to 0.55)</b>                                                                       | <b>0.28 (0.15 to 0.57)</b>                                                                       | NA | <b>0.26 (0.16 to 0.44)</b>                        |
| Capecitabine + Sunitinib                         | <b>0.23 (0.1 to 0.56)</b>                         | <b>0.24 (0.08 to 0.71)</b>                                                                       | <b>0.23 (0.08 to 0.78)</b>                                                                       | NA | <b>0.23 (0.09 to 0.58)</b>                        |
| Cyclophosphamide + Methotrexate + 5-Fluorouracil | <b>0.23 (0.1 to 0.51)</b>                         | <b>0.23 (0.09 to 0.61)</b>                                                                       | <b>0.23 (0.09 to 0.68)</b>                                                                       | NA | <b>0.24 (0.1 to 0.55)</b>                         |
| <b>Model Fit Statistics</b>                      | Residual Deviance =<br>58.12 vs 51<br>DIC = -4.11 | Residual Deviance =<br>52.50 vs 51<br>DIC = -4.36<br>Heterogeneity (SD) =<br>0.11 (0.01 to 0.26) | Residual Deviance =<br>52.11 vs 51<br>DIC = -4.63<br>Heterogeneity (SD) =<br>0.11 (0.01 to 0.26) | NA | Residual Deviance =<br>39.47 vs 39<br>DIC = -3.12 |

Primary NMA uses data from PALOMA-3 [33]. Values shown are hazard ratios with 95% CrI. Statistically significant differences are shown in bold.

CrI = credible interval; DIC = deviance information criterion; FE = fixed-effects; NA = not applicable; SA = sensitivity analysis; SD = standard deviation.

**1) Fixed- and random-effects models of first-line PFS/TTP analysis using both PALOMA-1 and PALOMA-2**

In the first-line fixed-effects model using both PALOMA-1 and PALOMA-2, palbociclib + letrozole was associated with improvements in PFS/TTP relative to all other treatments (**Table 8**). Palbociclib + letrozole showed statistically significant improvements in PFS/TTP relative to capecitabine (intermittent: HR = 0.28 [0.11 to 0.64]) and mitoxantrone (HR = 0.28 [0.13 to 0.54]), and trended toward improvements (not statistically significant) versus paclitaxel (HR = 0.57 [0.19 to 1.77]), docetaxel (HR = 0.5 [0.14 to 1.79]) and other monotherapy or combination chemotherapy agents (HRs ranging from 0.25 to 0.98). Palbociclib + letrozole was associated with the highest SUCRA value among all treatments (96.0%) and a mean rank value closest to 1. The probability of treatment being best was 42.8% for palbociclib + letrozole; all remaining treatments were associated with values below 30.0%.

**Table 8:** First-line Fixed-effects NMA Results for PFS/TTP: Palbociclib + Letrozole vs Comparators – Both PALOMA-1 and PALOMA-2

| Comparisons                                                    | HR (95% CrI)<br>Fixed-effects Model | SUCRA  | Probability<br>Best | Mean Rank<br>(95% CrI) |
|----------------------------------------------------------------|-------------------------------------|--------|---------------------|------------------------|
| Palbociclib + Letrozole                                        | 1                                   | 96.00% | 42.84%              | 2 (1 to 14)            |
| <b>Single Chemotherapy Agents and Endocrine Therapies</b>      |                                     |        |                     |                        |
| Anastrozole                                                    | 0.57 (0.41 to 0.79)                 | 64.00% | 0.01%               | 10 (2 to 21)           |
| Letrozole                                                      | 0.56 (0.46 to 0.68)                 | 64.00% | 0.00%               | 10 (2 to 21)           |
| Paclitaxel                                                     | 0.57 (0.19 to 1.77)                 | 64.00% | 0.00%               | 10 (4 to 22)           |
| Docetaxel                                                      | 0.5 (0.14 to 1.79)                  | 48.00% | 0.00%               | 14 (4 to 26)           |
| Exemestane                                                     | 0.46 (0.33 to 0.65)                 | 44.00% | 0.00%               | 15 (4 to 23)           |
| Tamoxifen                                                      | 0.39 (0.3 to 0.5)                   | 28.00% | 0.00%               | 19 (6 to 26)           |
| Megestrol Acetate                                              | 0.37 (0.26 to 0.54)                 | 24.00% | 0.00%               | 20 (7 to 26)           |
| Capecitabine (Intermittent)                                    | 0.28 (0.11 to 0.64)                 | 8.00%  | 0.00%               | 24 (12 to 26)          |
| Mitoxantrone                                                   | 0.28 (0.13 to 0.54)                 | 8.00%  | 0.00%               | 24 (14 to 26)          |
| <b>Combination Chemotherapy Agents and Endocrine Therapies</b> |                                     |        |                     |                        |
| Paclitaxel + Bevacizumab + Everolimus                          | 0.98 (0.29 to 3.44)                 | 96.00% | 29.70%              | 2 (1 to 14)            |
| Paclitaxel + Bevacizumab                                       | 0.95 (0.31 to 3.06)                 | 92.00% | 16.88%              | 3 (1 to 11)            |
| Docetaxel + Bevacizumab 15 mg                                  | 0.65 (0.18 to 2.35)                 | 76.00% | 5.80%               | 7 (1 to 22)            |
| Docetaxel + Bevacizumab 7.5 mg                                 | 0.58 (0.16 to 2.11)                 | 64.00% | 1.10%               | 10 (2 to 24)           |
| Paclitaxel + Sunitinib                                         | 0.58 (0.18 to 1.97)                 | 64.00% | 0.04%               | 10 (3 to 24)           |
| Docetaxel + Gemcitabine                                        | 0.58 (0.2 to 1.73)                  | 64.00% | 0.03%               | 10 (4 to 20)           |
| Liposomal Doxorubicin                                          | 0.53 (0.14 to 2.05)                 | 56.00% | 2.02%               | 12 (2 to 26)           |
| Paclitaxel + Gemcitabine                                       | 0.5 (0.15 to 1.69)                  | 52.00% | 0.47%               | 13 (3 to 26)           |
| Paclitaxel + Carboplatin                                       | 0.52 (0.17 to 1.68)                 | 52.00% | 0.04%               | 13 (4 to 25)           |
| Capecitabine + Bevacizumab + Vinorelbine                       | 0.48 (0.19 to 1.15)                 | 48.00% | 0.91%               | 14 (2 to 22)           |
| Docetaxel + Capecitabine                                       | 0.5 (0.19 to 1.35)                  | 48.00% | 0.05%               | 14 (4 to 23)           |

|                                                         |                                                |               |              |                      |
|---------------------------------------------------------|------------------------------------------------|---------------|--------------|----------------------|
| Capecitabine + Vinorelbine                              | 0.49 (0.16 to 1.55)                            | 48.00%        | 0.02%        | 14 (5 to 25)         |
| Docetaxel + Epirubicin                                  | 0.48 (0.2 to 1.06)                             | 44.00%        | 0.08%        | 15 (4 to 22)         |
| <b>Capecitabine + Bevacizumab</b>                       | <b>0.4 (0.16 to 0.96)</b>                      | <b>32.00%</b> | <b>0.01%</b> | <b>18 (4 to 24)</b>  |
| <b>Fluorouracil + Epirubicin + Cyclophosphamide</b>     | <b>0.34 (0.15 to 0.68)</b>                     | <b>20.00%</b> | <b>0.00%</b> | <b>21 (10 to 24)</b> |
| <b>Cyclophosphamide + Methotrexate + 5-Fluorouracil</b> | <b>0.25 (0.11 to 0.5)</b>                      | <b>4.00%</b>  | <b>0.00%</b> | <b>25 (18 to 26)</b> |
| <b>Model Fit Statistics</b>                             | Residual deviance = 25.42 vs 26<br>DIC = -1.04 |               |              |                      |

Statistically significant differences are shown in bold.

CrI = credible interval; DIC = deviance information criterion; HR = hazard ratio; SUCRA = Surface Under the Cumulative RANking curve.

Palbociclib + letrozole was also associated with improvements in PFS/TTP relative to all other treatments in the first-line random-effects model using vague priors including both PALOMA-1 and PALOMA-2 (Table 9). Although statistical significance was not observed, palbociclib + letrozole was associated with the highest SUCRA value among all treatments (84.0%), and the highest probability of being the best treatment (23.5%).

**Table 9:** First-line Random-effects (Vague Priors) NMA Results for PFS/TTP: Palbociclib + Letrozole vs Comparators – Both PALOMA-1 and PALOMA-2

| Comparisons                                                    | HR (95% CrI)<br>Random-effects<br>Model: Vague Priors | SUCRA  | Probability<br>Best | Mean Rank<br>(95% CrI) |
|----------------------------------------------------------------|-------------------------------------------------------|--------|---------------------|------------------------|
| Palbociclib + Letrozole                                        | 1                                                     | 84.00% | 23.45%              | 5 (1 to 25)            |
| <b>Single Chemotherapy Agents and Endocrine Therapies</b>      |                                                       |        |                     |                        |
| Paclitaxel                                                     | 0.57 (0.07 to 4.83)                                   | 60.00% | 0.67%               | 11 (3 to 25)           |
| Anastrozole                                                    | 0.55 (0.06 to 4.87)                                   | 56.00% | 5.49%               | 12 (1 to 26)           |
| Letrozole                                                      | 0.55 (0.05 to 6.34)                                   | 56.00% | 1.77%               | 12 (2 to 26)           |
| Liposomal Doxorubicin                                          | 0.53 (0.07 to 3.79)                                   | 52.00% | 5.04%               | 13 (1 to 26)           |
| Docetaxel                                                      | 0.5 (0.06 to 3.92)                                    | 52.00% | 0.55%               | 13 (3 to 25)           |
| Exemestane                                                     | 0.46 (0.05 to 3.96)                                   | 44.00% | 1.37%               | 15 (2 to 25)           |
| Megestrol Acetate                                              | 0.37 (0.04 to 3.15)                                   | 36.00% | 0.95%               | 17 (3 to 26)           |
| Tamoxifen                                                      | 0.39 (0.05 to 3.13)                                   | 36.00% | 0.63%               | 17 (3 to 26)           |
| Capecitabine (Intermittent)                                    | 0.27 (0.03 to 2.12)                                   | 24.00% | 0.90%               | 20 (3 to 26)           |
| Mitoxantrone                                                   | 0.27 (0.03 to 2.23)                                   | 24.00% | 0.51%               | 20 (4 to 26)           |
| <b>Combination Chemotherapy Agents and Endocrine Therapies</b> |                                                       |        |                     |                        |
| Paclitaxel + Bevacizumab + Everolimus                          | 0.98 (0.12 to 8.43)                                   | 80.00% | 18.15%              | 6 (1 to 26)            |
| Paclitaxel + Bevacizumab                                       | 0.96 (0.13 to 7.29)                                   | 80.00% | 9.28%               | 6 (1 to 24)            |
| Docetaxel + Bevacizumab 15 mg                                  | 0.65 (0.09 to 4.7)                                    | 64.00% | 6.92%               | 10 (1 to 26)           |
| Docetaxel + Bevacizumab 7.5 mg                                 | 0.58 (0.08 to 4.19)                                   | 60.00% | 4.56%               | 11 (1 to 26)           |
| Paclitaxel + Sunitinib                                         | 0.6 (0.07 to 4.93)                                    | 60.00% | 3.83%               | 11 (1 to 26)           |
| Docetaxel + Gemcitabine                                        | 0.57 (0.08 to 4.32)                                   | 60.00% | 0.34%               | 11 (3 to 23)           |
| Paclitaxel + Gemcitabine                                       | 0.49 (0.06 to 4.21)                                   | 52.00% | 2.12%               | 13 (2 to 26)           |
| Paclitaxel + Carboplatin                                       | 0.51 (0.06 to 4.35)                                   | 52.00% | 1.55%               | 13 (2 to 26)           |



|                                                  |                                                                                           |        |       |              |
|--------------------------------------------------|-------------------------------------------------------------------------------------------|--------|-------|--------------|
| Docetaxel + Capecitabine                         | 0.5 (0.06 to 4.19)                                                                        | 52.00% | 0.80% | 13 (3 to 24) |
| Capecitabine + Vinorelbine                       | 0.49 (0.06 to 4.18)                                                                       | 52.00% | 0.58% | 13 (3 to 25) |
| Capecitabine + Bevacizumab + Vinorelbine         | 0.46 (0.06 to 3.76)                                                                       | 48.00% | 6.67% | 14 (1 to 26) |
| Docetaxel + Epirubicin                           | 0.46 (0.06 to 3.32)                                                                       | 48.00% | 0.80% | 14 (3 to 24) |
| Capecitabine + Bevacizumab                       | 0.39 (0.05 to 2.82)                                                                       | 40.00% | 2.26% | 16 (2 to 26) |
| Fluorouracil + Epirubicin + Cyclophosphamide     | 0.32 (0.04 to 2.47)                                                                       | 32.00% | 0.29% | 18 (4 to 25) |
| Cyclophosphamide + Methotrexate + 5-Fluorouracil | 0.24 (0.03 to 2.11)                                                                       | 20.00% | 0.51% | 21 (4 to 26) |
| <b>Model Fit Statistics</b>                      | Residual Deviance = 25.71 vs 26<br>DIC = 0.11<br>Heterogeneity (SD) = 0.67 (0.01 to 4.53) |        |       |              |

CrI = credible interval; DIC = deviance information criterion; HR = hazard ratio; SD = standard deviation; SUCRA = Surface Under the Cumulative RAnking curve.

## **2) Fixed- and random-effects models excluding studies with the largest differences in median PFS/TTP for primary first- and second-line analyses**

Some of the connecting nodes in the treatment network (i.e., those with connections to multiple interventions in the network and multiple studies which can be compared) were noted to have variable median PFS/TTP durations, despite the administration of equivalent interventions. This is likely a result of differences in patient characteristics. As a sensitivity analysis, we excluded studies wherein the largest differences in median PFS/TTP were observed. For example, if there were two studies in one connection and they went into a node, we kept the study that was most similar in terms of median PFS/TTP to other connections leaving the same node.

This sensitivity analysis was not possible for the first-line PFS/TTP network, since it is only comprised of single study connections. A comparison of observed median values for second-line PFS/TTP is shown in **Figure 1**, with excluded studies circled. Rugo 2013, Miller 2007, Wang 2015, Martin 2015, Dombernowsky 1998, Buzdar 1997, Osborne 2002, Jiang 2014, and Ohno 2010 were excluded due to the largest differences in median PFS/TTP values. The second-line fixed-effects NMA results suggest that palbociclib + fulvestrant is associated with improvements in PFS/TTP relative to all other treatments (**Table 10**). Palbociclib + fulvestrant showed statistically significant improvements in PFS/TTP relative to capecitabine (continuous: HR = 0.27 [0.11 to 0.66]; intermittent: HR = 0.28 [0.11 to 0.68]) and mitoxantrone (HR = 0.27 [0.12 to 0.58]), and trended toward improvements (not statistically significant) versus docetaxel (HR = 0.83 [0.25 to 2.71]), paclitaxel (HR = 0.55 [0.17 to 1.77]), and other monotherapy or combination chemotherapy agents (HRs ranging from 0.19 to 1.18). With the exception of everolimus + exemestane, palbociclib + fulvestrant was associated with the highest SUCRA value among all treatments (94.1%), and a probability best of 14.6%.



**Table 10:** Second-line Fixed-effects NMA Results for PFS/TTP: Palbociclib + Fulvestrant vs Comparators – Studies with Largest Median Survival Time Differences Removed

| Comparisons                                                    | HR (95% CrI)<br>Fixed-effects Model | SUCRA         | Probability<br>Best | Mean Rank<br>(95% CrI) |
|----------------------------------------------------------------|-------------------------------------|---------------|---------------------|------------------------|
| Palbociclib + Fulvestrant                                      | 1                                   | 94.12%        | 14.64%              | 3 (1 to 18)            |
| <b>Single Chemotherapy Agents and Endocrine Therapies</b>      |                                     |               |                     |                        |
| Doxorubicin                                                    | 0.92 (0.28 to 3.01)                 | 91.18%        | 11.05%              | 4 (1 to 13)            |
| Docetaxel                                                      | 0.83 (0.25 to 2.71)                 | 88.24%        | 0.91%               | 5 (2 to 15)            |
| Paclitaxel                                                     | 0.55 (0.17 to 1.77)                 | 61.76%        | 0.00%               | 14 (9 to 27)           |
| <b>Fulvestrant 500/250 mg</b>                                  | <b>0.46 (0.3 to 0.7)</b>            | <b>52.94%</b> | <b>0.00%</b>        | <b>17 (3 to 28)</b>    |
| <b>Exemestane</b>                                              | <b>0.45 (0.3 to 0.67)</b>           | <b>50.00%</b> | <b>0.00%</b>        | <b>18 (4 to 28)</b>    |
| <b>Fulvestrant 500 mg</b>                                      | <b>0.46 (0.36 to 0.59)</b>          | <b>50.00%</b> | <b>0.00%</b>        | <b>18 (3 to 29)</b>    |
| <b>Anastrozole</b>                                             | <b>0.39 (0.28 to 0.55)</b>          | <b>38.24%</b> | <b>0.00%</b>        | <b>22 (6 to 32)</b>    |
| <b>Fulvestrant 250 mg</b>                                      | <b>0.37 (0.28 to 0.5)</b>           | <b>32.35%</b> | <b>0.00%</b>        | <b>24 (7 to 34)</b>    |
| <b>Letrozole</b>                                               | <b>0.37 (0.23 to 0.58)</b>          | <b>32.35%</b> | <b>0.00%</b>        | <b>24 (7 to 33)</b>    |
| <b>Megestrol Acetate</b>                                       | <b>0.36 (0.24 to 0.54)</b>          | <b>32.35%</b> | <b>0.00%</b>        | <b>24 (8 to 33)</b>    |
| <b>Capecitabine (Continuous)</b>                               | <b>0.27 (0.11 to 0.66)</b>          | <b>17.65%</b> | <b>0.00%</b>        | <b>29 (18 to 34)</b>   |
| <b>Capecitabine (Intermittent)</b>                             | <b>0.28 (0.11 to 0.68)</b>          | <b>17.65%</b> | <b>0.00%</b>        | <b>29 (17 to 33)</b>   |
| <b>Mitoxantrone</b>                                            | <b>0.27 (0.12 to 0.58)</b>          | <b>14.71%</b> | <b>0.00%</b>        | <b>30 (20 to 34)</b>   |
| <b>Pegylated Liposomal Doxorubicin</b>                         | <b>0.19 (0.07 to 0.53)</b>          | <b>0.00%</b>  | <b>0.00%</b>        | <b>35 (22 to 35)</b>   |
| <b>Combination Chemotherapy Agents and Endocrine Therapies</b> |                                     |               |                     |                        |
| Everolimus + Exemestane                                        | 1.18 (0.74 to 1.88)                 | 97.06%        | 45.93%              | 2 (1 to 16)            |
| Docetaxel + Sunitinib                                          | 0.9 (0.27 to 3.01)                  | 91.18%        | 11.25%              | 4 (1 to 14)            |
| Paclitaxel + Bevacizumab + Gemcitabine                         | 0.86 (0.24 to 3.08)                 | 88.24%        | 13.08%              | 5 (1 to 19)            |
| Capecitabine + Vinorelbine                                     | 0.72 (0.22 to 2.37)                 | 79.41%        | 1.67%               | 8 (2 to 21)            |
| Paclitaxel + Gemcitabine                                       | 0.71 (0.22 to 2.32)                 | 79.41%        | 0.80%               | 8 (3 to 21)            |
| Paclitaxel + Bevacizumab                                       | 0.7 (0.2 to 2.41)                   | 76.47%        | 0.22%               | 9 (3 to 23)            |
| Docetaxel + Gemcitabine                                        | 0.61 (0.19 to 1.93)                 | 70.59%        | 0.00%               | 11 (7 to 23)           |
| Paclitaxel + Motesanib                                         | 0.58 (0.17 to 1.98)                 | 64.71%        | 0.18%               | 13 (4 to 29)           |
| Nab-Paclitaxel + Bevacizumab                                   | 0.58 (0.17 to 2.04)                 | 64.71%        | 0.01%               | 13 (5 to 29)           |
| Paclitaxel + Carboplatin                                       | 0.5 (0.15 to 1.67)                  | 55.88%        | 0.00%               | 16 (8 to 31)           |
| Docetaxel + Capecitabine                                       | 0.51 (0.17 to 1.58)                 | 55.88%        | 0.00%               | 16 (10 to 28)          |
| Docetaxel + Epirubicin                                         | 0.47 (0.19 to 1.17)                 | 52.94%        | 0.01%               | 17 (7 to 27)           |
| Capecitabine + Sorafenib                                       | 0.43 (0.16 to 1.18)                 | 47.06%        | 0.24%               | 19 (3 to 31)           |
| Paclitaxel + Epirubicin                                        | 0.4 (0.11 to 1.4)                   | 41.18%        | 0.01%               | 21 (10 to 33)          |
| <b>Fluorouracil + Epirubicin + Cyclophosphamide</b>            | <b>0.32 (0.14 to 0.73)</b>          | <b>29.41%</b> | <b>0.00%</b>        | <b>25 (15 to 31)</b>   |
| Paclitaxel + Capecitabine                                      | 0.34 (0.09 to 1.2)                  | 26.47%        | 0.00%               | 26 (14 to 35)          |
| Paclitaxel + Epirubicin + Capecitabine                         | 0.33 (0.1 to 1.15)                  | 26.47%        | 0.00%               | 26 (16 to 35)          |
| <b>Aminoglutethimide + Corticosteroid</b>                      | <b>0.26 (0.16 to 0.44)</b>          | <b>14.71%</b> | <b>0.00%</b>        | <b>30 (13 to 35)</b>   |
| <b>Cyclophosphamide + Methotrexate + 5-Fluorouracil</b>        | <b>0.24 (0.1 to 0.55)</b>           | <b>8.82%</b>  | <b>0.00%</b>        | <b>32 (24 to 35)</b>   |
| <b>Capecitabine + Sunitinib</b>                                | <b>0.23 (0.09 to 0.58)</b>          | <b>5.88%</b>  | <b>0.00%</b>        | <b>33 (21 to 35)</b>   |

|                             |                                                |
|-----------------------------|------------------------------------------------|
| <b>Model Fit Statistics</b> | Residual Deviance = 39.47 vs 39<br>DIC = -3.12 |
|-----------------------------|------------------------------------------------|

Statistically significant differences are shown in bold.

CrI = credible interval; DIC = deviance information criterion; HR = hazard ratio; SUCRA = Surface Under the Cumulative Ranking curve.

With the exception of everolimus + exemestane, palbociclib + fulvestrant was associated with improvements in PFS/TTP relative to all other treatments in the second-line random-effects model using vague priors, including fulvestrant (500 mg) (**Table 11**). With the exception of everolimus + exemestane, palbociclib + fulvestrant was associated with the highest SUCRA value among all treatments (94.1%), and a probability best of 18.4%.

**Table 11:** Second-line Random-effects (Vague Priors) NMA Results for PFS/TTP: Palbociclib + Fulvestrant vs Comparators – Studies with Largest Median Survival Time Differences Removed

| Comparisons                                                    | HR (95% CrI)                       | SUCRA         | Probability Best | Mean Rank (95% CrI)  |
|----------------------------------------------------------------|------------------------------------|---------------|------------------|----------------------|
|                                                                | Random-effects Model: Vague Priors |               |                  |                      |
| Palbociclib + Fulvestrant                                      | 1                                  | 94.12%        | 18.42%           | 3 (1 to 20)          |
| <b>Single Chemotherapy Agents and Endocrine Therapies</b>      |                                    |               |                  |                      |
| Doxorubicin                                                    | 0.86 (0.2 to 4.21)                 | 91.18%        | 10.71%           | 4 (1 to 19)          |
| Docetaxel                                                      | 0.77 (0.19 to 3.45)                | 85.29%        | 0.74%            | 6 (2 to 20)          |
| Paclitaxel                                                     | 0.52 (0.13 to 2.36)                | 58.82%        | 0.00%            | 15 (8 to 29)         |
| <b>Fulvestrant 500/250 mg</b>                                  | <b>0.46 (0.23 to 0.91)</b>         | <b>52.94%</b> | <b>0.02%</b>     | <b>17 (3 to 31)</b>  |
| <b>Fulvestrant 500 mg</b>                                      | <b>0.46 (0.29 to 0.71)</b>         | <b>52.94%</b> | <b>0.01%</b>     | <b>17 (3 to 32)</b>  |
| <b>Exemestane</b>                                              | <b>0.45 (0.22 to 0.91)</b>         | <b>50.00%</b> | <b>0.00%</b>     | <b>18 (4 to 30)</b>  |
| <b>Anastrozole</b>                                             | <b>0.4 (0.22 to 0.75)</b>          | <b>41.18%</b> | <b>0.01%</b>     | <b>21 (5 to 33)</b>  |
| <b>Letrozole</b>                                               | <b>0.37 (0.16 to 0.83)</b>         | <b>35.29%</b> | <b>0.03%</b>     | <b>23 (5 to 34)</b>  |
| <b>Fulvestrant 250 mg</b>                                      | <b>0.37 (0.22 to 0.64)</b>         | <b>35.29%</b> | <b>0.00%</b>     | <b>23 (6 to 34)</b>  |
| <b>Megestrol Acetate</b>                                       | <b>0.37 (0.18 to 0.74)</b>         | <b>32.35%</b> | <b>0.00%</b>     | <b>24 (8 to 33)</b>  |
| Capecitabine (Intermittent)                                    | 0.28 (0.08 to 1.03)                | 20.59%        | 0.01%            | 28 (11 to 33)        |
| <b>Capecitabine (Continuous)</b>                               | <b>0.27 (0.08 to 0.98)</b>         | <b>17.65%</b> | <b>0.03%</b>     | <b>29 (11 to 35)</b> |
| <b>Mitoxantrone</b>                                            | <b>0.27 (0.1 to 0.76)</b>          | <b>17.65%</b> | <b>0.00%</b>     | <b>29 (15 to 35)</b> |
| <b>Pegylated Liposomal Doxorubicin</b>                         | <b>0.19 (0.05 to 0.79)</b>         | <b>2.94%</b>  | <b>0.02%</b>     | <b>34 (16 to 35)</b> |
| <b>Combination Chemotherapy Agents and Endocrine Therapies</b> |                                    |               |                  |                      |
| Everolimus + Exemestane                                        | 1.19 (0.52 to 2.72)                | 97.06%        | 41.23%           | 2 (1 to 18)          |
| Paclitaxel + Bevacizumab + Gemcitabine                         | 0.81 (0.17 to 4.21)                | 88.24%        | 12.16%           | 5 (1 to 26)          |
| Docetaxel + Sunitinib                                          | 0.83 (0.19 to 4.02)                | 88.24%        | 8.98%            | 5 (1 to 22)          |
| Capecitabine + Vinorelbine                                     | 0.69 (0.17 to 3.09)                | 79.41%        | 2.19%            | 8 (2 to 24)          |
| Paclitaxel + Gemcitabine                                       | 0.68 (0.16 to 3.24)                | 76.47%        | 2.06%            | 9 (2 to 25)          |
| Paclitaxel + Bevacizumab                                       | 0.67 (0.15 to 3.23)                | 76.47%        | 0.48%            | 9 (2 to 28)          |
| Docetaxel + Gemcitabine                                        | 0.58 (0.15 to 2.65)                | 67.65%        | 0.02%            | 12 (5 to 25)         |
| Nab-Paclitaxel + Bevacizumab                                   | 0.56 (0.12 to 2.83)                | 64.71%        | 0.50%            | 13 (3 to 32)         |

|                                                         |                                                                                             |               |              |                      |
|---------------------------------------------------------|---------------------------------------------------------------------------------------------|---------------|--------------|----------------------|
| Paclitaxel + Motesanib                                  | 0.55 (0.12 to 2.74)                                                                         | 61.76%        | 0.45%        | 14 (3 to 31)         |
| Paclitaxel + Carboplatin                                | 0.49 (0.11 to 2.37)                                                                         | 55.88%        | 0.07%        | 16 (6 to 31)         |
| Docetaxel + Capecitabine                                | 0.49 (0.13 to 2.11)                                                                         | 55.88%        | 0.01%        | 16 (8 to 29)         |
| Docetaxel + Epirubicin                                  | 0.46 (0.14 to 1.6)                                                                          | 50.00%        | 0.06%        | 18 (5 to 28)         |
| Capecitabine + Sorafenib                                | 0.44 (0.11 to 1.78)                                                                         | 47.06%        | 1.20%        | 19 (2 to 32)         |
| Paclitaxel + Epirubicin + Capecitabine                  | 0.39 (0.08 to 2.11)                                                                         | 38.24%        | 0.32%        | 22 (5 to 34)         |
| Paclitaxel + Capecitabine                               | 0.33 (0.07 to 1.81)                                                                         | 29.41%        | 0.15%        | 25 (8 to 35)         |
| Fluorouracil + Epirubicin + Cyclophosphamide            | 0.32 (0.11 to 1.01)                                                                         | 29.41%        | 0.00%        | 25 (12 to 32)        |
| Paclitaxel + Epirubicin + Capecitabine                  | 0.32 (0.07 to 1.68)                                                                         | 26.47%        | 0.01%        | 26 (12 to 35)        |
| <b>Aminoglutethimide + Corticosteroid</b>               | <b>0.27 (0.11 to 0.67)</b>                                                                  | <b>17.65%</b> | <b>0.05%</b> | <b>29 (10 to 35)</b> |
| <b>Cyclophosphamide + Methotrexate + 5-Fluorouracil</b> | <b>0.24 (0.07 to 0.79)</b>                                                                  | <b>11.76%</b> | <b>0.01%</b> | <b>31 (18 to 35)</b> |
| <b>Capecitabine + Sunitinib</b>                         | <b>0.23 (0.06 to 0.91)</b>                                                                  | <b>8.82%</b>  | <b>0.04%</b> | <b>32 (13 to 35)</b> |
| <b>Model Fit Statistics</b>                             | Residual Deviance = 38.34 vs 39<br>DIC = -2.18<br>Heterogeneity (SD) = 0.14 (0.003 to 0.45) |               |              |                      |

Statistically significant differences are shown in bold.

CrI = credible interval; DIC = deviance information criterion; HR = hazard ratio; SD = standard deviation; SUCRA = Surface Under the Cumulative RANking curve.

## Appendix F: PRISMA NMA Checklist

**Table 12:** PRISMA NMA Checklist of Items to Include When Reporting a Systematic Review Involving a Network Meta-analysis

| Section/<br>Topic            | Item<br># | Checklist Item                                                                                                                                                                                                                                                                                                                                                                                                                                                                                                                                                                                                                                                                                                                                                                          | Reported<br>on Page # |
|------------------------------|-----------|-----------------------------------------------------------------------------------------------------------------------------------------------------------------------------------------------------------------------------------------------------------------------------------------------------------------------------------------------------------------------------------------------------------------------------------------------------------------------------------------------------------------------------------------------------------------------------------------------------------------------------------------------------------------------------------------------------------------------------------------------------------------------------------------|-----------------------|
| <b>TITLE</b>                 |           |                                                                                                                                                                                                                                                                                                                                                                                                                                                                                                                                                                                                                                                                                                                                                                                         |                       |
| Title                        | 1         | Identify the report as a systematic review <i>incorporating a network meta-analysis (or related form of meta-analysis)</i> .                                                                                                                                                                                                                                                                                                                                                                                                                                                                                                                                                                                                                                                            | 1                     |
| <b>ABSTRACT</b>              |           |                                                                                                                                                                                                                                                                                                                                                                                                                                                                                                                                                                                                                                                                                                                                                                                         |                       |
| Structured<br>summary        | 2         | Provide a structured summary including, as applicable:<br><b>Background:</b> main objectives<br><b>Methods:</b> data sources; study eligibility criteria, participants, and interventions; study appraisal; and <i>synthesis methods, such as network meta-analysis</i> .<br><b>Results:</b> number of studies and participants identified; summary estimates with corresponding confidence/credible intervals; <i>treatment rankings may also be discussed. Authors may choose to summarize pairwise comparisons against a chosen treatment included in their analyses for brevity.</i><br><b>Discussion/Conclusions:</b> limitations; conclusions and implications of findings.<br><b>Other:</b> primary source of funding; systematic review registration number with registry name. | 2                     |
| <b>INTRODUCTION</b>          |           |                                                                                                                                                                                                                                                                                                                                                                                                                                                                                                                                                                                                                                                                                                                                                                                         |                       |
| Rationale                    | 3         | Describe the rationale for the review in the context of what is already known, <i>including mention of why a network meta-analysis has been conducted</i> .                                                                                                                                                                                                                                                                                                                                                                                                                                                                                                                                                                                                                             | 4                     |
| Objectives                   | 4         | Provide an explicit statement of questions being addressed, with reference to population, interventions, comparisons, outcomes, and study design (PICOS).                                                                                                                                                                                                                                                                                                                                                                                                                                                                                                                                                                                                                               | 4                     |
| <b>METHODS</b>               |           |                                                                                                                                                                                                                                                                                                                                                                                                                                                                                                                                                                                                                                                                                                                                                                                         |                       |
| Protocol and<br>registration | 5         | Indicate whether a review protocol exists and if and where it can be accessed (e.g., Web address); and, if available, provide registration information, including registration number.                                                                                                                                                                                                                                                                                                                                                                                                                                                                                                                                                                                                  | NA                    |
| Eligibility criteria         | 6         | Specify study characteristics (e.g., PICOS, length of follow-up) and report characteristics (e.g., years considered, language, publication status) used as criteria for eligibility, giving rationale. <i>Clearly describe eligible treatments included in the treatment network, and note whether any have been clustered or merged into the same node (with justification)</i> .                                                                                                                                                                                                                                                                                                                                                                                                      | 4-5                   |
| Information<br>sources       | 7         | Describe all information sources (e.g., databases with dates of coverage, contact with study authors to identify additional studies) in the search and date last searched.                                                                                                                                                                                                                                                                                                                                                                                                                                                                                                                                                                                                              | 4                     |

|                                        |    |                                                                                                                                                                                                                                                                                                                                                                                                                                                   |                  |
|----------------------------------------|----|---------------------------------------------------------------------------------------------------------------------------------------------------------------------------------------------------------------------------------------------------------------------------------------------------------------------------------------------------------------------------------------------------------------------------------------------------|------------------|
| Search                                 | 8  | Present full electronic search strategy for at least one database, including any limits used, such that it could be repeated.                                                                                                                                                                                                                                                                                                                     | 4,<br>Appendix A |
| Study selection                        | 9  | State the process for selecting studies (i.e., screening, eligibility, included in systematic review, and, if applicable, included in the meta-analysis).                                                                                                                                                                                                                                                                                         | 5,<br>Appendix B |
| Data collection process                | 10 | Describe method of data extraction from reports (e.g., piloted forms, independently, in duplicate) and any processes for obtaining and confirming data from investigators.                                                                                                                                                                                                                                                                        | 5                |
| Data items                             | 11 | List and define all variables for which data were sought (e.g., PICOS, funding sources) and any assumptions and simplifications made.                                                                                                                                                                                                                                                                                                             | 5,<br>Appendix B |
| Geometry of the network                | S1 | Describe methods used to explore the geometry of the treatment network under study and potential biases related to it. This should include how the evidence base has been graphically summarized for presentation, and what characteristics were compiled and used to describe the evidence base to readers.                                                                                                                                      | 5                |
| Risk of bias within individual studies | 12 | Describe methods used for assessing risk of bias of individual studies (including specification of whether this was done at the study or outcome level), and how this information is to be used in any data synthesis.                                                                                                                                                                                                                            | 6,<br>Appendix D |
| Summary measures                       | 13 | State the principal summary measures (e.g., risk ratio, difference in means). <i>Also describe the use of additional summary measures assessed, such as treatment rankings and surface under the cumulative ranking curve (SUCRA) values, as well as modified approaches used to present summary findings from meta-analyses.</i>                                                                                                                 | 5-6              |
| Planned methods of analysis            | 14 | Describe the methods of handling data and combining results of studies for each network meta-analysis. This should include, but not be limited to: <ul style="list-style-type: none"> <li>• <i>Handling of multi-arm trials;</i></li> <li>• <i>Selection of variance structure;</i></li> <li>• <i>Selection of prior distributions in Bayesian analyses; and</i></li> <li>• <i>Assessment of model fit.</i></li> </ul>                            | 5-6              |
| Assessment of Inconsistency            | S2 | Describe the statistical methods used to evaluate the agreement of direct and indirect evidence in the treatment network(s) studied. Describe efforts taken to address its presence when found.                                                                                                                                                                                                                                                   | 6                |
| Risk of bias across studies            | 15 | Specify any assessment of risk of bias that may affect the cumulative evidence (e.g., publication bias, selective reporting within studies).                                                                                                                                                                                                                                                                                                      | 6,<br>Appendix D |
| Additional analyses                    | 16 | Describe methods of additional analyses if done, indicating which were pre-specified. This may include, but not be limited to, the following: <ul style="list-style-type: none"> <li>• Sensitivity or subgroup analyses;</li> <li>• Meta-regression analyses;</li> <li>• <i>Alternative formulations of the treatment network; and</i></li> <li>• <i>Use of alternative prior distributions for Bayesian analyses (if applicable).</i></li> </ul> | 6,<br>Appendix E |
| <b>RESULTS**</b>                       |    |                                                                                                                                                                                                                                                                                                                                                                                                                                                   |                  |

|                                          |           |                                                                                                                                                                                                                                                                                                                                                                                                                                                               |                        |
|------------------------------------------|-----------|---------------------------------------------------------------------------------------------------------------------------------------------------------------------------------------------------------------------------------------------------------------------------------------------------------------------------------------------------------------------------------------------------------------------------------------------------------------|------------------------|
| Study selection                          | 17        | Give numbers of studies screened, assessed for eligibility, and included in the review, with reasons for exclusions at each stage, ideally with a flow diagram.                                                                                                                                                                                                                                                                                               | 6-8, Figure 1          |
| <b>Presentation of network structure</b> | <b>S3</b> | Provide a network graph of the included studies to enable visualization of the geometry of the treatment network.                                                                                                                                                                                                                                                                                                                                             | Figures 2-3            |
| <b>Summary of network geometry</b>       | <b>S4</b> | Provide a brief overview of characteristics of the treatment network. This may include commentary on the abundance of trials and randomized patients for the different interventions and pairwise comparisons in the network, gaps of evidence in the treatment network, and potential biases reflected by the network structure.                                                                                                                             | 6-8                    |
| Study characteristics                    | 18        | For each study, present characteristics for which data were extracted (e.g., study size, PICOS, follow-up period) and provide the citations.                                                                                                                                                                                                                                                                                                                  | 7-8                    |
| Risk of bias within studies              | 19        | Present data on risk of bias of each study and, if available, any outcome level assessment.                                                                                                                                                                                                                                                                                                                                                                   | 7, Appendix D          |
| Results of individual studies            | 20        | For all outcomes considered (benefits or harms), present, for each study: 1) simple summary data for each intervention group, and 2) effect estimates and confidence intervals. <i>Modified approaches may be needed to deal with information from larger networks.</i>                                                                                                                                                                                       | Available upon request |
| Synthesis of results                     | 21        | Present results of each meta-analysis done, including confidence/credible intervals. <i>In larger networks, authors may focus on comparisons versus a particular comparator (e.g., placebo or standard care), with full findings presented in an appendix. League tables and forest plots may be considered to summarize pairwise comparisons.</i> If additional summary measures were explored (such as treatment rankings), these should also be presented. | 7-8                    |
| <b>Exploration for inconsistency</b>     | <b>S5</b> | Describe results from investigations of inconsistency. This may include such information as measures of model fit to compare consistency and inconsistency models, <i>P</i> values from statistical tests, or summary of inconsistency estimates from different parts of the treatment network.                                                                                                                                                               | 7-8                    |
| Risk of bias across studies              | 22        | Present results of any assessment of risk of bias across studies for the evidence base being studied.                                                                                                                                                                                                                                                                                                                                                         | 7, Appendix D          |
| Results of additional analyses           | 23        | Give results of additional analyses, if done (e.g., sensitivity or subgroup analyses, meta-regression analyses, <i>alternative network geometries studied, alternative choice of prior distributions for Bayesian analyses, and so forth</i> ).                                                                                                                                                                                                               | 8, Appendix E          |
| <b>DISCUSSION</b>                        |           |                                                                                                                                                                                                                                                                                                                                                                                                                                                               |                        |
| Summary of evidence                      | 24        | Summarize the main findings, including the strength of evidence for each main outcome; consider their relevance to key groups (e.g., healthcare providers, users, and policy-makers).                                                                                                                                                                                                                                                                         | 8-10                   |
| Limitations                              | 25        | Discuss limitations at study and outcome level (e.g., risk of bias), and at review level (e.g., incomplete retrieval of identified research, reporting bias). <i>Comment on the validity of the assumptions, such as transitivity and consistency. Comment on any concerns regarding network geometry (e.g., avoidance of certain comparisons).</i>                                                                                                           | 9-10                   |
| Conclusions                              | 26        | Provide a general interpretation of the results in the context of other evidence, and implications for future research.                                                                                                                                                                                                                                                                                                                                       | 10                     |



**FUNDING**

Funding

27 Describe sources of funding for the systematic review and other support (e.g., supply of data); role of funders for the systematic review. This should also include information regarding whether funding has been received from manufacturers of treatments in the network and/or whether some of the authors are content experts with professional conflicts of interest that could affect use of treatments in the network.

1, 10

---

\*Text in italics indicates wording specific to reporting of network meta-analyses that has been added to guidance from the PRISMA statement.

\*\*Authors may wish to plan for use of appendices to present all relevant information in full detail for items in this section.

PICOS = population, intervention, comparators, outcomes, study design

## REFERENCES

1. Bonnetterre J, Dieras V, Tubiana-Hulin M, Bougnoux P, Bonnetterre ME, Delozier T, Mayer F, Culine S, Dohoulou N, Bendahmane B (2004) Phase II multicentre randomised study of docetaxel plus epirubicin vs 5-fluorouracil plus epirubicin and cyclophosphamide in metastatic breast cancer. *Br J Cancer* 91 (8):1466-1471. doi:10.1038/sj.bjc.6602179
2. Cineri S, Chan A, Altundag K, Vandebroek A, Tubiana-Mathieu N, Barnadas A, Dodyk P, Lazzarelli S, Botha M, Rauch D, Khasanov R, Slabber CF, Bougnoux P, Cardenas JS, Castellanos Diez J, Schmidt M, Godes MJ, Chen DR, Villanova G, Coskun U (2014) Three-arm randomised phase II study evaluating oral vinorelbine plus capecitabine versus paclitaxel plus gemcitabine versus docetaxel plus gemcitabine as first-line chemotherapy in patients with metastatic breast cancer: final results (NorCap-CA223 trial). ASCO 50th Annual Meeting
3. Finn RS, Crown JP, Lang I, Boer K, Bondarenko IM, Kulyk SO, Ettl J, Patel R, Pinter T, Schmidt M, Shparyk Y, Thummala AR, Voytko NL, Fowst C, Huang X, Kim ST, Randolph S, Slamon DJ (2015) The cyclin-dependent kinase 4/6 inhibitor palbociclib in combination with letrozole versus letrozole alone as first-line treatment of oestrogen receptor-positive, HER2-negative, advanced breast cancer (PALOMA-1/TRIO-18): a randomised phase 2 study. *Lancet Oncol* 16 (1):25-35. doi:10.1016/S1470-2045(14)71159-3
4. Finn RS, Martin M, Rugo H, Jones S, Im SA, Gelmon K, Harbeck N, Lipatov ON, Walshe JM, Moulder S, Gauthier E, Lu DR, Randolph S, Dieras V, Slamon DJ (2016) Palbociclib and letrozole in advanced breast cancer. *The New England journal of medicine* 375 (20):1925-1936
5. Miles DW, Chan A, Dirix LY, Cortes J, Pivot X, Tomczak P, Delozier T, Sohn JH, Provencher L, Puglisi F, Harbeck N, Steger GG, Schneeweiss A, Wardley AM, Chlistalla A, Romieu G (2010) Phase III study of bevacizumab plus docetaxel compared with placebo plus docetaxel for the first-line treatment of human epidermal growth factor receptor 2-negative metastatic breast cancer. *J Clin Oncol* 28 (20):3239-3247. doi:10.1200/JCO.2008.21.6457
6. Mouridsen H, Gershanovich M, Sun Y, Perez-Carrion R, Boni C, Monnier A, Apffelstaedt J, Smith R, Sleeboom HP, Janicke F, Pluzanska A, Dank M, Becquart D, Bapsy PP, Salminen E, Snyder R, Lassus M, Verbeek JA, Staffler B, Chaudri-Ross HA, Dugan M (2001) Superior efficacy of letrozole versus tamoxifen as first-line therapy for postmenopausal women with advanced breast cancer: results of a phase III study of the International Letrozole Breast Cancer Group. *J Clin Oncol* 19 (10):2596-2606
7. Nabholz JM, Buzdar A, Pollak M, Harwin W, Burton G, Mangalik A, Steinberg M, Webster A, von Euler M (2000) Anastrozole is superior to tamoxifen as first-line therapy for advanced breast cancer in postmenopausal women: results of a North American multicenter randomized trial. Arimidex Study Group. *J Clin Oncol* 18 (22):3758-3767
8. O'Shaughnessy JA, Blum J, Moiseyenko V, Jones SE, Miles D, Bell D, Rosso R, Mauriac L, Osterwalder B, Burger H-U, Laws S (2001) Randomized, open-label, phase II trial of oral capecitabine (Xeloda) vs. a reference arm of intravenous CMF (cyclophosphamide, methotrexate and 5-fluorouracil) as first-line therapy for advanced/metastatic breast cancer. *Annals of Oncology* 12:1247-1254
9. Paridaens RJ, Dirix LY, Beex LV, Nooij M, Cameron DA, Cufer T, Piccart MJ, Bogaerts J, Therasse P (2008) Phase III study comparing exemestane with tamoxifen as first-line hormonal treatment of metastatic breast cancer in postmenopausal women: the European Organisation for Research and Treatment of Cancer Breast Cancer Cooperative Group. *J Clin Oncol* 26 (30):4883-4890. doi:10.1200/JCO.2007.14.4659
10. Robert NJ, Saleh MN, Paul D, Generali D, Gressot L, Copur MS, Brufsky AM, Minton SE, Giguere JK, Smith JW, 2nd, Richards PD, Gernhardt D, Huang X, Liao KF, Kern KA, Davis J (2011) Sunitinib plus paclitaxel versus bevacizumab plus paclitaxel for first-line treatment of patients with advanced breast cancer: a phase III, randomized, open-label trial. *Clin Breast Cancer* 11 (2):82-92. doi:10.1016/j.clbc.2011.03.005

11. Robert NJ, Dieras V, Glaspy J, Brufsky AM, Bondarenko I, Lipatov ON, Perez EA, Yardley DA, Chan SY, Zhou X, Phan SC, O'Shaughnessy J (2011) RIBBON-1: randomized, double-blind, placebo-controlled, phase III trial of chemotherapy with or without bevacizumab for first-line treatment of human epidermal growth factor receptor 2-negative, locally recurrent or metastatic breast cancer. *J Clin Oncol* 29 (10):1252-1260. doi:10.1200/JCO.2010.28.0982
12. Robertson JF, Lindemann JP, Llombart-Cussac A, Rolski J, Feltl D, Dewar J, Emerson L, Dean A, Ellis MJ (2012) Fulvestrant 500 mg versus anastrozole 1 mg for the first-line treatment of advanced breast cancer: follow-up analysis from the randomized 'FIRST' study. *Breast cancer research and treatment* 136 (2):503-511. doi:10.1007/s10549-012-2192-4
13. Vici P, Giotta F, Di Lauro L, Sergi D, Vizza E, Mariani L, Latorre A, Pizzuti L, D'Amico C, Giannarelli D, Colucci G (2011) A multicenter phase II randomized trial of docetaxel/gemcitabine versus docetaxel/capecitabine as first-line treatment for advanced breast cancer: a Gruppo Oncologico Italia Meridionale study. *Oncology* 81 (3-4):230-236. doi:10.1159/000334432
14. Welt A, Marschner N, Lerchenmueller C, Decker T, Steffens CC, Koehler A, Depenbusch R, Busies S, Hegewisch-Becker S (2016) Capecitabine and bevacizumab with or without vinorelbine in first-line treatment of HER2/neu-negative metastatic or locally advanced breast cancer: final efficacy and safety data of the randomised, open-label superiority phase 3 CARIN trial. *Breast cancer research and treatment* 156 (1):97-107. doi:10.1007/s10549-016-3727-x
15. Yardley DA, Burris HA, 3rd, Spigel DR, Clark BL, Vazquez E, Shipley D, Barton J, Thompson D, Montes I, Greco FA, Hainsworth JD (2009) A phase II randomized crossover study of liposomal doxorubicin versus weekly docetaxel in the first-line treatment of women with metastatic breast cancer. *Clin Breast Cancer* 9 (4):247-252. doi:10.3816/CBC.2009.n.042
16. Yardley DA, Bosserman LD, O'Shaughnessy JA, Harwin WN, Morgan SK, Priego VM, Peacock NW, Bass JD, Burris HA, 3rd, Hainsworth JD (2015) Paclitaxel, bevacizumab, and everolimus/placebo as first-line treatment for patients with metastatic HER2-negative breast cancer: a randomized placebo-controlled phase II trial of the Sarah Cannon Research Institute. *Breast cancer research and treatment* 154 (1):89-97. doi:10.1007/s10549-015-3599-5
17. Bachelot T, Bajard A, Ray-Coquard I, Provencal J, Coeffic D, Agostini C, Boisseau M, Kaphan R, Dramais D, Oprea C, Ferri-Dessens RM, Guastalla JP, Perol D (2011) Final results of ERASME-4: a randomized trial of first-line docetaxel plus either capecitabine or epirubicin for metastatic breast cancer. *Oncology* 80 (3-4):262-268. doi:10.1159/000329066
18. Dixon AR, Jackson L, Chan S, Haybittle J, Blamey RW (1992) A randomised trial of second-line hormone vs single agent chemotherapy in tamoxifen resistant advanced breast cancer. *Br J Cancer* 66 (2):402-404
19. Fountzilas G, Dafni U, Dimopoulos MA, Koutras A, Skarlos D, Papakostas P, Gogas H, Bafaloukos D, Kalogera-Fountzila A, Samantas E, Briasoulis E, Pectasides D, Maniadakis N, Matsiakou F, Aravantinos G, Papadimitriou C, Karina M, Christodoulou C, Kosmidis P, Kalofonos HP (2009) A randomized phase III study comparing three anthracycline-free taxane-based regimens, as first line chemotherapy, in metastatic breast cancer: a Hellenic Cooperative Oncology Group study. *Breast cancer research and treatment* 115 (1):87-99. doi:10.1007/s10549-008-0047-9
20. Ghosn M, Aftimos P, Farhat FS, Kattan JG, Hanna C, Haddad N, Nasr F, Chahine G (2011) A phase II randomized study comparing navelbine and capecitabine (Navcap) followed either by Navcap or by weekly docetaxel in the first-line treatment of HER-2/neu negative metastatic breast cancer. *Med Oncol* 28 Suppl 1:S142-151. doi:10.1007/s12032-010-9754-2
21. Heidemann E, Stoeger H, Souchon R, Hirschmann WD, Bodenstein H, Oberhoff C, Fischer JT, Schulze M, Clemens M, Andreesen R, Mahlke M, Konig M, Scharl A, Fehnle K, Kaufmann M (2002) Is first-line single-agent mitoxantrone in the treatment of high-risk metastatic breast cancer patients as effective as combination chemotherapy? No difference in survival but higher quality of life were found in a multicenter randomized trial. *Ann Oncol* 13 (11):1717-1729

22. Kaufmann M, Bajetta E, Dirix LY, Fein LE, Jones SE, Zilembo N, Dugardyn JL, Nasurdi C, Mennel RG, Cervek J, Fowst C, Polli A, di Salle E, Arkhipov A, Piscitelli G, Miller LL, Massimini G (2000) Exemestane is superior to megestrol acetate after tamoxifen failure in postmenopausal women with advanced breast cancer: results of a phase III randomized double-blind trial. The Exemestane Study Group. *J Clin Oncol* 18 (7):1399-1411
23. Miller K, Wang M, Gralow J, Dickler M, Cobleigh M, Perez EA, Shenkier T, Cella D, Davidson NE (2007) Paclitaxel plus bevacizumab versus paclitaxel alone for metastatic breast cancer. *The New England journal of medicine* 357 (26):2666-2676. doi:10.1056/NEJMoa072113
24. Ackland SP, Anton A, Breitbach GP, Colajori E, Tursi JM, Delfino C, Efremidis A, Ezzat A, Fittipaldo A, Kolaric K, Lopez M, Viaro D, group Hs (2001) Dose-intensive epirubicin-based chemotherapy is superior to an intensive intravenous cyclophosphamide, methotrexate, and fluorouracil regimen in metastatic breast cancer: a randomized multinational study. *J Clin Oncol* 19 (4):943-953
25. Baselga J, Segalla JG, Roche H, Del Giglio A, Pinczowski H, Ciruelos EM, Filho SC, Gomez P, Van Eyll B, Bermejo B, Llombart A, Garicochea B, Duran MA, Hoff PM, Espie M, de Moraes AA, Ribeiro RA, Mathias C, Gil Gil M, Ojeda B, Morales J, Kwon Ro S, Li S, Costa F (2012) Sorafenib in combination with capecitabine: an oral regimen for patients with HER2-negative locally advanced or metastatic breast cancer. *J Clin Oncol* 30 (13):1484-1491. doi:10.1200/JCO.2011.36.7771
26. Bergh J, Bondarenko IM, Lichinitser MR, Liljegren A, Greil R, Voytko NL, Makhson AN, Cortes J, Lortholary A, Bischoff J, Chan A, Delaloge S, Huang X, Kern KA, Giorgetti C (2012) First-line treatment of advanced breast cancer with sunitinib in combination with docetaxel versus docetaxel alone: results of a prospective, randomized phase III study. *J Clin Oncol* 30 (9):921-929. doi:10.1200/JCO.2011.35.7376
27. Brufsky A, Hoelzer K, Beck T, Whorf R, Keaton M, Nadella P, Krill-Jackson E, Kroener J, Middleman E, Frontiera M, Paul D, Panella T, Bromund J, Zhao L, Orlando M, Tai F, Marciniak MD, Obasaju C, Hainsworth J (2011) A randomized phase II study of paclitaxel and bevacizumab with and without gemcitabine as first-line treatment for metastatic breast cancer. *Clin Breast Cancer* 11 (4):211-220. doi:10.1016/j.clbc.2011.03.019
28. Buzdar AU, Jones SE, Vogel CL, Wolter J, Plourde P, Webster A (1997) A phase III trial comparing anastrozole (1 and 10 milligrams), a potent and selective aromatase inhibitor, with megestrol acetate in postmenopausal women with advanced breast carcinoma. Arimidex Study Group. *Cancer* 79 (4):730-739
29. Buzdar A, Douma J, Davidson N, Elledge R, Morgan M, Smith R, Porter L, Nabholtz J, Xiang X, Brady C (2001) Phase III, multicenter, double-blind, randomized study of letrozole, an aromatase inhibitor, for advanced breast cancer versus megestrol acetate. *J Clin Oncol* 19 (14):3357-3366
30. Campone M, Dobrovolskaya N, Tjulandin S, Chen SC, Fourie S, Mefti F, Konstantinova M, Lefresne F, Meheust N, Jassem J (2013) A three-arm randomized phase II study of oral vinorelbine plus capecitabine versus oral vinorelbine and capecitabine in sequence versus docetaxel plus capecitabine in patients with metastatic breast cancer previously treated with anthracyclines. *Breast J* 19 (3):240-249. doi:10.1111/tbj.12098
31. Chan S, Romieu G, Huober J, Delozier T, Tubiana-Hulin M, Schneeweiss A, Lluch A, Llombart A, du Bois A, Kreienberg R, Mayordomo JI, Anton A, Harrison M, Jones A, Carrasco E, Vaury AT, Frimodt-Moller B, Fumoleau P (2009) Phase III study of gemcitabine plus docetaxel compared with capecitabine plus docetaxel for anthracycline-pretreated patients with metastatic breast cancer. *J Clin Oncol* 27 (11):1753-1760. doi:10.1200/JCO.2007.15.8485
32. Chia S, Gradishar W, Mauriac L, Bines J, Amant F, Federico M, Fein L, Romieu G, Buzdar A, Robertson JF, Brufsky A, Possinger K, Rennie P, Sapunar F, Lowe E, Piccart M (2008) Double-blind, randomized placebo controlled trial of fulvestrant compared with exemestane after prior nonsteroidal aromatase inhibitor therapy in postmenopausal women with hormone receptor-positive, advanced breast cancer: results from EFECT. *J Clin Oncol* 26 (10):1664-1670. doi:10.1200/JCO.2007.13.5822

33. Cristofanilli M, Turner NC, Bondarenko I, Ro J, Im SA, Masuda N, Colleoni M, DeMichele A, Loi S, Verma S, Iwata H, Harbeck N, Zhang K, Theall KP, Jiang Y, Bartlett CH, Koehler M, Slamon D (2016) Fulvestrant plus palbociclib versus fulvestrant plus placebo for treatment of hormone-receptor-positive, HER2-negative metastatic breast cancer that progressed on previous endocrine therapy (PALOMA-3): final analysis of the multicentre, double-blind, phase 3 randomised controlled trial. *Lancet Oncol*. doi:10.1016/S1470-2045(15)00613-0
34. Crown JP, Dieras V, Staroslawska E, Yardley DA, Bachelot T, Davidson N, Wildiers H, Fasching PA, Capitain O, Ramos M, Greil R, Cognetti F, Fountzilas G, Blasinska-Morawiec M, Liedtke C, Kreienberg R, Miller WH, Jr., Tassell V, Huang X, Paolini J, Kern KA, Romieu G (2013) Phase III trial of sunitinib in combination with capecitabine versus capecitabine monotherapy for the treatment of patients with pretreated metastatic breast cancer. *J Clin Oncol* 31 (23):2870-2878. doi:10.1200/JCO.2012.43.3391
35. Del Mastro L, Fabi A, Mansutti M, De Laurentiis M, Durando A, Merlo DF, Bruzzi P, La Torre I, Ceccarelli M, Kazeem G, Marchi P, Boy D, Venturini M, De Placido S, Cognetti F (2013) Randomised phase 3 open-label trial of first-line treatment with gemcitabine in association with docetaxel or paclitaxel in women with metastatic breast cancer: a comparison of different schedules and treatments. *BMC cancer* 13:164. doi:10.1186/1471-2407-13-164
36. Di Leo A, Jerusalem G, Petruzelka L, Torres R, Bondarenko IN, Khasanov R, Verhoeven D, Pedrini JL, Smirnova I, Lichinitser MR, Pendergrass K, Garnett S, Lindemann JP, Sapunar F, Martin M (2010) Results of the CONFIRM phase III trial comparing fulvestrant 250 mg with fulvestrant 500 mg in postmenopausal women with estrogen receptor-positive advanced breast cancer. *J Clin Oncol* 28 (30):4594-4600. doi:10.1200/JCO.2010.28.8415
37. Dombrowsky P, Smith I, Falkson G, Leonard R, Panasci L, Bellmunt J, Bezwoda W, Gardin G, Gudgeon A, Morgan M, Fornasiero A, Hoffmann W, Michel J, Hatschek T, Tjabbes T, Chaudri HA, Hornberger U, Trunet PF (1998) Letrozole, a new oral aromatase inhibitor for advanced breast cancer: double-blind randomized trial showing a dose effect and improved efficacy and tolerability compared with megestrol acetate. *J Clin Oncol* 16 (2):453-461
38. Fountzilas G, Kalofonos HP, Dafni U, Papadimitriou C, Bafaloukos D, Papakostas P, Kalogera-Fountzila A, Gogas H, Aravantinos G, Mouloupoulos LA, Economopoulos T, Pectasides D, Maniatakis N, Sifaka V, Briasoulis E, Christodoulou C, Tsavdaridis D, Makrantonakis P, Razis E, Kosmidis P, Skarlos D, Dimopoulos MA (2004) Paclitaxel and epirubicin versus paclitaxel and carboplatin as first-line chemotherapy in patients with advanced breast cancer: a phase III study conducted by the Hellenic Cooperative Oncology Group. *Ann Oncol* 15 (10):1517-1526. doi:10.1093/annonc/mdh395
39. Gershanovich M, Chaudri HA, Campos D, Lurie H, Bonaventura A, Jeffrey M, Buzzi F, Bodrogi I, Ludwig H, Reichardt P, O'Higgins N, Romieu G, Friederich P, Lassus M (1998) Letrozole, a new oral aromatase inhibitor: randomised trial comparing 2.5 mg daily, 0.5 mg daily and aminoglutethimide in postmenopausal women with advanced breast cancer. Letrozole International Trial Group (AR/BC3). *Ann Oncol* 9 (6):639-645
40. Hatschek T, Carlsson L, Einbeigi Z, Lidbrink E, Linderholm B, Lindh B, Loman N, Malmberg M, Rotstein S, Soderberg M, Sundquist M, Walz TM, Hellstrom M, Svensson H, Astrom G, Brandberg Y, Carstensen J, Ferno M, Bergh J (2012) Individually tailored treatment with epirubicin and paclitaxel with or without capecitabine as first-line chemotherapy in metastatic breast cancer: a randomized multicenter trial. *Breast cancer research and treatment* 131 (3):939-947. doi:10.1007/s10549-011-1880-9
41. Howell A, Robertson JF, Quaresma Albano J, Aschermannova A, Mauriac L, Kleeberg UR, Vergote I, Erikstein B, Webster A, Morris C (2002) Fulvestrant, formerly ICI 182,780, is as effective as anastrozole in postmenopausal women with advanced breast cancer progressing after prior endocrine treatment. *J Clin Oncol* 20 (16):3396-3403
42. Jiang Z, Zhang Q, Shao Z, Shen K, Li L, Feng J, Tong Z, Gu K, Wang X, Xu B, Sun G, Chen H, Rukazenkov Y (2014) A phase III study of fulvestrant 500 mg versus 250 mg in postmenopausal Chinese women with

advanced breast cancer and disease progression following failure on prior antiestrogen or aromatase inhibitor therapy: Supporting superior clinical benefit for the 500 mg dose. Proceedings of the Thirty-Seventh Annual CTSC-AACR San Antonio Breast Cancer Symposium

43. Jonat W, Howell A, Blomqvist C, Eiermann W, Winblad G, Tyrrell C, Mauriac L, Roche H, Lundgren S, Hellmund R, Azab M (1996) A randomised trial comparing two doses of the new selective aromatase inhibitor anastrozole (Arimidex) with megestrol acetate in postmenopausal patients with advanced breast cancer. *Eur J Cancer* 32A (3):404-412

44. Jones SE, Erban J, Overmoyer B, Budd GT, Hutchins L, Lower E, Laufman L, Sundaram S, Urba WJ, Pritchard KI, Mennel R, Richards D, Olsen S, Meyers ML, Ravdin PM (2005) Randomized phase III study of docetaxel compared with paclitaxel in metastatic breast cancer. *J Clin Oncol* 23 (24):5542-5551. doi:10.1200/JCO.2005.02.027

45. Luck HJ, Du Bois A, Loibl S, Schrader I, Huober J, Heilmann V, Beckmann M, Stahler A, Jackisch C, Hubalek M, Richter B, Stickeler E, Eidtmann H, Thomssen C, Untch M, Wollschlager K, Schuster T, von Minckwitz G (2013) Capecitabine plus paclitaxel versus epirubicin plus paclitaxel as first-line treatment for metastatic breast cancer: efficacy and safety results of a randomized, phase III trial by the AGO Breast Cancer Study Group. *Breast cancer research and treatment* 139 (3):779-787. doi:10.1007/s10549-013-2589-8

46. Martin M, Roche H, Pinter T, Crown J, Kennedy MJ, Provencher L, Priou F, Eiermann W, Adrover E, Lang I, Ramos M, Latreille J, Jagiello-Gruszfeld A, Pienkowski T, Alba E, Snyder R, Almel S, Rolski J, Munoz M, Moroosse R, Hurvitz S, Banos A, Adewoye H, Hei YJ, Lindsay MA, Rupin M, Cabaribere D, Lemmerick Y, Mackey JR, investigators T (2011) Motesanib, or open-label bevacizumab, in combination with paclitaxel, as first-line treatment for HER2-negative locally recurrent or metastatic breast cancer: a phase 2, randomised, double-blind, placebo-controlled study. *Lancet Oncol* 12 (4):369-376. doi:10.1016/S1470-2045(11)70037-7

47. Martin M, Martinez N, Ramos M, Calvo L, Lluch A, Zamora P, Munoz M, Carrasco E, Caballero R, Garcia-Saenz JA, Guerra E, Caronia D, Casado A, Ruiz-Borrego M, Hernando B, Chacon JI, De la Torre-Montero JC, Jimeno MA, Heras L, Alonso R, De la Haba J, Pita G, Constenla M, Gonzalez-Neira A (2015) Standard versus continuous administration of capecitabine in metastatic breast cancer (GEICAM/2009-05): a randomized, noninferiority phase II trial with a pharmacogenetic analysis. *Oncologist* 20 (2):111-112. doi:10.1634/theoncologist.2014-0379

48. Ohno S, Rai Y, Iwata H, Yamamoto N, Yoshida M, Iwase H, Masuda N, Nakamura S, Taniguchi H, Kamigaki S, Noguchi S (2010) Three dose regimens of fulvestrant in postmenopausal Japanese women with advanced breast cancer: results from a double-blind, phase II comparative study (FINDER1). *Ann Oncol* 21 (12):2342-2347. doi:10.1093/annonc/mdq249

49. Osborne CK, Pippen J, Jones SE, Parker LM, Ellis M, Come S, Gertler SZ, May JT, Burton G, Dimery I, Webster A, Morris C, Elledge R, Buzdar A (2002) Double-blind, randomized trial comparing the efficacy and tolerability of fulvestrant versus anastrozole in postmenopausal women with advanced breast cancer progressing on prior endocrine therapy: results of a North American trial. *J Clin Oncol* 20 (16):3386-3395

50. Papadimitriou CA, Kalofonos H, Zagouri F, Papakostas P, Bozas G, Makatsoris T, Dimopoulos MA, Fountzilas G (2009) Weekly docetaxel with or without gemcitabine as second-line chemotherapy in paclitaxel-pretreated patients with metastatic breast cancer: a randomized phase II study conducted by the Hellenic Co-Operative Oncology Group. *Oncology* 77 (3-4):212-216. doi:10.1159/000236021

51. Pritchard KI, Rolski J, Papai Z, Mauriac L, Cardoso F, Chang J, Panasci L, Ianuli C, Kahan Z, Fukase K, Lindemann JP, Macpherson MP, Neven P (2010) Results of a phase II study comparing three dosing regimens of fulvestrant in postmenopausal women with advanced breast cancer (FINDER2). *Breast cancer research and treatment* 123 (2):453-461. doi:10.1007/s10549-010-1022-9

52. Rugo HS, Campone M, Amadori D, Aldrighetti D, Conte P, Wardley A, Villanueva C, Melisko M, McHenry MB, Liu D, Lee F, Pivot X (2013) A randomized, phase II, three-arm study of two schedules of ixabepilone

or paclitaxel plus bevacizumab as first-line therapy for metastatic breast cancer. *Breast cancer research and treatment* 139 (2):411-419. doi:10.1007/s10549-013-2552-8

53. Rugo HS, Barry WT, Moreno-Aspitia A, Lyss AP, Cirrincione C, Leung E, Mayer EL, Naughton M, Toppmeyer D, Carey LA, Perez EA, Hudis C, Winer EP (2015) Randomized Phase III Trial of Paclitaxel Once Per Week Compared With Nanoparticle Albumin-Bound Nab-Paclitaxel Once Per Week or Ixabepilone With Bevacizumab As First-Line Chemotherapy for Locally Recurrent or Metastatic Breast Cancer: CALGB 40502/NCCTG N063H (Alliance). *J Clin Oncol* 33 (21):2361-2369. doi:10.1200/JCO.2014.59.5298

54. Smorenburg CH, de Groot SM, van Leeuwen-Stok AE, Hamaker ME, Wymenga AN, de Graaf H, de Jongh FE, Braun JJ, Los M, Maartense E, van Tinteren H, Nortier JW, Seynaeve C (2014) A randomized phase III study comparing pegylated liposomal doxorubicin with capecitabine as first-line chemotherapy in elderly patients with metastatic breast cancer: results of the OMEGA study of the Dutch Breast Cancer Research Group BOOG. *Ann Oncol* 25 (3):599-605. doi:10.1093/annonc/mdt588

55. Stockler MR, Harvey VJ, Francis PA, Byrne MJ, Ackland SP, Fitzharris B, Van Hazel G, Wilcken NR, Grimison PS, Nowak AK, Gainford MC, Fong A, Paksec L, Sourjina T, Zannino D, Gebiski V, Simes RJ, Forbes JF, Coates AS (2011) Capecitabine versus classical cyclophosphamide, methotrexate, and fluorouracil as first-line chemotherapy for advanced breast cancer. *J Clin Oncol* 29 (34):4498-4504. doi:10.1200/JCO.2010.33.9101

56. Wang J, Xu B, Yuan P, Ma F, Li Q, Zhang P, Cai R, Fan Y, Luo Y, Li Q (2015) Capecitabine combined with docetaxel versus vinorelbine followed by capecitabine maintenance medication for first-line treatment of patients with advanced breast cancer: Phase 3 randomized trial. *Cancer* 121 (19):3412-3421. doi:10.1002/cncr.29492

57. Xu B, Jiang Z, Shao Z, Wang J, Feng J, Song S, Chen Z, Gu K, Yu S, Zhang Y, Wang C, Zhang F, Yang J (2011) Fulvestrant 250 mg versus anastrozole for Chinese patients with advanced breast cancer: results of a multicentre, double-blind, randomised phase III trial. *Cancer Chemother Pharmacol* 67 (1):223-230. doi:10.1007/s00280-010-1483-x

58. Yardley DA, Noguchi S, Pritchard KI, Burris HA, 3rd, Baselga J, Gnant M, Hortobagyi GN, Campone M, Pistilli B, Piccart M, Melichar B, Petrakova K, Arena FP, Erdkamp F, Harb WA, Feng W, Cahana A, Taran T, Lebwohl D, Rugo HS (2013) Everolimus plus exemestane in postmenopausal patients with HR(+) breast cancer: BOLERO-2 final progression-free survival analysis. *Adv Ther* 30 (10):870-884. doi:10.1007/s12325-013-0060-1

59. Paridaens R, Biganzoli L, Bruning P, Klijn JG, Gamucci T, Houston S, Coleman R, Schachter J, Van Vreckem A, Sylvester R, Awada A, Wildiers J, Piccart M (2000) Paclitaxel versus doxorubicin as first-line single-agent chemotherapy for metastatic breast cancer: a European Organization for Research and Treatment of Cancer Randomized Study with cross-over. *J Clin Oncol* 18 (4):724-733

60. NICE (2012) Process and methods guides. The guidelines manual. National Institute for Health and Care Excellence
